# 1 **Biophysical demonstration of co-packaging of glutamate and GABA in** 2 **individual synaptic vesicles in the central nervous system**

3

4

5 SeulAh Kim<sup>1</sup>, Michael L. Wallace<sup>1,3</sup>, Mahmoud El-Rifai<sup>2</sup>, Alexa R. Knudsen<sup>1</sup>, Bernardo L. Sabatini<sup>1,\*</sup>

6

7 Affiliations:

8 1. Howard Hughes Medical Institute, Dept. of Neurobiology, Harvard Medical School, 220

9 Longwood Ave, Boston, MA, 02115, USA.

10 2. Department of Neurobiology, Harvard Medical School, 220 Longwood Ave, Boston, MA,

11 01225, USA.

12 3. Current address: Dept. of Anatomy and Neurobiology, Boston University School of

13 Medicine, 72 E. Concord St., Boston, MA, 02118, USA.

14

15 **Contact Info**

16 \*Correspondence: [bsabatini@hms.harvard.edu](mailto:bsabatini@hms.harvard.edu)

17 **Summary**

18

19 Many mammalian neurons release multiple neurotransmitters to activate diverse classes of

20 ionotropic receptors on their postsynaptic targets. Entopeduncular nucleus somatostatin (EP

21 *Sst+*) neurons that project to the lateral habenula (LHb) release both glutamate and GABA, but

22 it is unclear if these are packaged into the same or segregated pools of synaptic vesicles. Here

23 we describe a novel method combining electrophysiology, spatially-patterned optogenetics,

24 and computational modeling designed to analyze the mechanism of glutamate/GABA corelease.

25 We find that the properties of PSCs elicited in LHb neurons by optogenetic activation of EP *Sst+*

26 terminals are only consistent with co-packaging of glutamate and GABA into individual vesicles.

27 Furthermore, serotonin, which acts presynaptically to weaken EP *Sst+* to LHb synapses, does so

28 by altering the release probability of vesicles containing both transmitters. Our approach is

29 broadly applicable to the study of multi-transmitter neurons throughout the brain and our  
30 results constrain mechanisms of neuromodulation in LHb.

## 31 **Keywords**

32 neurotransmitter co-release; basal ganglia; lateral habenula; entopeduncular nucleus; digital  
33 micromirror device; computational modeling

## 34 **Introduction**

35 Many neurons in the mammalian brain can produce, store and release multiple  
36 neurotransmitters (Tritsch et al., 2016). Co-release refers to chemical release of two or more  
37 neurotransmitters, emphasizing a property of the pre-synaptic terminal. In contrast, the term co-  
38 transmission highlights the functional aspect of neurotransmission, hence implying the presence  
39 of post-synaptic receptors that detect each of the released transmitters. Despite the prevalence  
40 of multi-transmitter neurons throughout the brain, our understanding of how, when, and where  
41 multiple neurotransmitters are released and what purpose such co-release serves remains  
42 incomplete.

43 The mechanisms and post-synaptic consequences of neurotransmitter co-release from  
44 multi-transmitter neurons varies. For example, in some cases multiple small-molecule (i.e. non-  
45 peptide transmitters) neurotransmitters are thought to be packaged into the same vesicle (Jonas  
46 et al., 1998; Shabel et al., 2014; Tritsch et al., 2012) whereas in other cases a single cell makes  
47 multiple classes of pre-synaptic boutons, each of which releases a different transmitter (Granger  
48 et al., 2020; Lee et al., 2010; Zhang et al., 2015). Furthermore, even if two transmitters are  
49 released in the same vesicle from a single synaptic bouton, the opposing post-synaptic target  
50 may not have receptors for both transmitters, preventing co-transmission of the signal to the  
51 post-synaptic cell. Conversely, two transmitters may be released from different presynaptic  
52 terminals, but, if these are made onto the same post-synaptic cell, co-transmission will occur. For  
53 these reasons, it is technically challenging to functionally analyze the mechanisms of  
54 neurotransmitter co-release and reveal their importance to neural circuits. In particular, the  
55 mechanisms of co-release and co-transmission at synapses formed by multi-transmitter neurons

56 is difficult to determine from the average synaptic responses, necessitating experiments  
57 examining single release events from single synapses.

58 Co-transmitting neurons are found in the entopeduncular nucleus (EP), a basal ganglia  
59 output nucleus comprised of multiple neural populations differentiable by their transcriptome,  
60 the types of neurotransmitters they release, and their projection targets. Somatostatin positive  
61 (*Sst+*) EP neurons project solely to the lateral habenula (LHb) and express the molecular  
62 machinery necessary to release glutamate and GABA (Wallace et al., 2017). Indeed, stimulation  
63 of EP *Sst+* axons causes release of glutamate and GABA and results in compound synaptic  
64 currents in postsynaptic LHb neurons mediated by opening of ionotropic glutamate and GABA  
65 receptors (Root et al., 2018; Wallace et al., 2017).

66 Although individual axons of *Sst+* EP neurons are thought to release both glutamate and  
67 GABA, their mechanism of co-transmission remains inconclusive. One proposed mechanism is  
68 co-packaging of glutamate and GABA in the same vesicles. This model is supported by the  
69 detection of biphasic miniature spontaneous synaptic responses in LHb neurons, suggesting that  
70 they are generated by glutamate and GABA co-released from individual vesicles (Shabel et al.,  
71 2014). A second model is segregation of glutamate and GABA into different pools of synaptic  
72 vesicles that are independently released from the same terminal. This model is supported by  
73 ultrastructural evidence showing that the glutamate and GABA vesicular transporters, Vglut2 and  
74 Vgat, respectively, are found in separate pools of vesicles within the same axon terminals in LHb  
75 (Root et al., 2018). Moreover, synaptic vesicles isolated from LHb are immunoreactive against  
76 either Vgat or Vglut2 (Root et al., 2018).

77 Whether glutamate and GABA release from EP *Sst+* neurons in the LHb occurs via co-  
78 packaging in individual vesicles or by co-transmission from separate pools has important  
79 functional consequences. LHb regulates major monoaminergic centers in the brain (Hu et al.,  
80 2020; Matsumoto and Hikosaka, 2009, 2007). EP heavily innervates the lateral portion of LHb and  
81 is implicated in aversion, encoding of reward prediction error and action-outcome evaluation  
82 (Hong and Hikosaka, 2008; Li et al., 2019; Shabel et al., 2012; Stephenson-Jones et al., 2016).  
83 Furthermore, synaptic plasticity that shifts the relative proportion of glutamatergic vs. GABAergic  
84 co-transmission from EP to LHb alters the excitability (Li et al., 2011) and bursting states of LHb

85 neurons (Yang et al., 2018). This change is thought to drive animals towards maladaptive  
86 behavior states, such as depression, chronic-stress induced passive coping, and addiction  
87 (Cerniauskas et al., 2019; Li et al., 2011; Maroteaux and Mameli, 2012; Meye et al., 2016; Shabel  
88 et al., 2014; Trusel et al., 2019). Therefore, the mechanism by which glutamate/GABA co-  
89 transmission occurs, and how it may be modulated by plasticity, likely has important functional  
90 implications for stress, anxiety and depression.

91 Here we combine molecular, computational, pharmacological and electrophysiological  
92 analyses to distinguish the two models of glutamate and GABA co-release at synapses between  
93 EP *Sst+* and LHb neurons. Immunohistochemical analysis of the distributions of synaptic proteins  
94 reveals that the proteins necessary for glutamate and GABA release are colocalized within  
95 individual EP *Sst+* terminals. We characterize differential statistical features expected by the two  
96 distinct release modes and compare them to experimental results collected using an advanced  
97 optogenetic activation approach that targets individual EP *Sst+* boutons. We discover that  
98 glutamate and GABA are co-packaged in the same vesicles in EP *Sst+* terminals. In addition,  
99 serotonin co-modulates release of both glutamate and GABA while maintaining the correlation  
100 between glutamatergic and GABAergic unitary responses, further supporting that the two  
101 transmitters are released from the same vesicle. Our methods are generally applicable to the  
102 study of the mechanism of co-release of neurotransmitters from multi-transmitter neurons. Our  
103 findings have important implications for plasticity mechanisms underlying shifted balance of  
104 glutamatergic and GABAergic transmissions between EP and LHb in maladaptive states.

## 105 **Results**

### 106 **Functional and molecular evidence of co-release of glutamate and GABA from EP *Sst+* axons** 107 **in LHb**

108 Somatostatin-expressing neurons (*Sst+*) that reside in the anterior region of the EP release  
109 both glutamate and GABA (Shabel et al., 2014; Wallace et al., 2017). To gain optogenetic control,  
110 we replicated a previous approach that transduces *Sst+* neurons' cell bodies in the EP and labels  
111 their axons in the LHb (Wallace et al., 2017). We bilaterally injected adeno-associated virus (AAV)  
112 that expresses the channelrhodopsin variant oChIEF in a Cre-dependent manner (AAV-DIO-  
113 oChIEF) into the EP of *Sst-IRES-Cre* (*Sst-Cre*) mice (Figure 1A) (Lin et al., 2009; Taniguchi et al.,

114 2011). Consistent with a previous study demonstrating monosynaptic release of glutamate and  
115 GABA (Wallace et al., 2017), optogenetic activation triggered a biphasic post-synaptic current  
116 (PSC) in a LHb neuron under whole-cell voltage-clamp recording (holding voltage,  $V_h = -35$  mV)  
117 in the presence of the NMDA receptor antagonist CPP (Figure 1B). This current profile results  
118 from the faster opening and closing kinetics of AMPA receptors (AMPA) compared to GABA<sub>A</sub>  
119 receptors (GABA<sub>A</sub>Rs). Both GABAergic and glutamatergic currents persist in the presence of  
120 TTX/4AP, consistent with direct release of both transmitters from the optogenetically stimulated  
121 axons (Wallace et al., 2017). Thus, this genetic strategy grants access to and permits manipulation  
122 of the glutamate/GABA co-releasing EP-to-LHb projections.

123 Individual EP *Sst+* neurons express genes necessary for both glutamatergic and GABAergic  
124 transmission (Root et al., 2018; Shabel et al., 2014). To examine if individual synaptic boutons  
125 from these neurons in LHb express the proteins necessary for synaptic release of both glutamate  
126 and GABA, we used array tomography (Micheva and Smith, 2007). Cre-dependent expression of  
127 synaptophysin-YFP induced by AAV injection (AAV-DIO-Syn-YFP) into EP labeled *Sst+* presynaptic  
128 terminals in LHb. Serial sections were immunolabeled for YFP, Vglut2, Vgat, PSD95, and  
129 Gephyrin (Figure 1C-D). As expected, YFP was found in EP *Sst+* pre-synaptic terminals and  
130 colocalized with pre-synaptic protein marker Synapsin-1 (Figure 1D).

131 We hypothesized that if glutamate and GABA are released from the same pre-synaptic  
132 terminals, then the vesicular machinery for glutamate and GABA packaging (Vglut2 and Vgat,  
133 respectively) should co-localize. The relationships between the distributions of immunolabeled  
134 proteins were analyzed by two methods (Granger et al., 2020). First, individual boutons were  
135 identified and their boundaries determined from the YFP signal. Similarly, individual  
136 immunolabeled puncta for each antibody were identified and the centroid of fluorescence of  
137 each punctum was calculated (Figure 1D; Supplemental Figure 1A). To determine if specific  
138 antigens are preferentially localized in the YFP-defined boutons, we measured the fraction of  
139 YFP-positive pixels containing the centroid of an antibody punctum and compared it to that  
140 expected by chance (1000 randomizations of centroid locations) (Figure 1E). Synapsin  
141 immunopuncta were found within the YFP+ regions far more often than expected by chance  
142 (Figure 1E; Supplemental Figure 1B). Similarly, Vgat and Vglut2 immunolabeling often overlapped

143 (Figure 1D) and puncta for both proteins were found in YFP-labeled terminals far-above chance  
144 (Figure 1E; Supplemental Figure 1C). In addition, we examined the overlap of YFP+ terminals with  
145 post-synaptic scaffolding proteins associated with glutamate (PSD95) and GABA (Gephyrin)  
146 receptors. We found strong non-random expression of Gephyrin overlapping with YFP+ boutons  
147 and weaker, but still above-chance, expression of PSD95 (Figure 1D-E; Supplemental Figure 1C).

148 For the second method of analysis, we avoided identifying individual immunopuncta and  
149 instead analyzed the cross-correlation and covariances of fluorescence intensities after  
150 normalizing each fluorescent channel independently to mean 0 and variance 1. Analysis of cross-  
151 correlations across each set of tissue images (Figure 1F) is dominated by immunolabeling outside  
152 of the YFP+ boutons, which cover on average only ~0.3% of the image pixels (0.1-0.6% in 4 tissue  
153 stacks, 3 animals). Whole-image analysis revealed weak cross-correlations across all antibody  
154 channels (mean across samples: 0.003-0.294; individual samples: 0.0007-0.423), peaking at mean  
155 image displacement of 0. To focus analysis on the *Sst+* presynaptic terminals, we restricted  
156 analysis to the image areas within YFP-labeled terminals (Figure 1G). The Vgat-Vglut2 signal  
157 intensities had high positive covariance within the boundaries of YFP+ presynaptic terminals,  
158 indicating that glutamatergic and GABAergic vesicular transporters overlap in boutons of EP *Sst+*  
159 axons. Similarly analyzed Vgat-Gephyrin signals had high positive covariance, consistent with  
160 overlap of inhibitory pre- and post-synaptic densities for GABAergic terminals (Figure 1F-G). The  
161 signal from the PSD95 antibody did not exhibit positive covariance with any of the other  
162 antibodies, possibly due its low enrichment within the YFP+ boutons (Figure 1E, G) (Granger et  
163 al., 2020; Saunders et al., 2015).

164 Thus, individual EP *Sst+* presynaptic boutons in the LHb have the molecular machinery  
165 necessary to release both glutamate and GABA and colocalize with scaffolding proteins  
166 associated with GABA receptors. This indicates that individual boutons likely contain both  
167 transporters. However, due to the small size of synaptic vesicles compared to primary and  
168 secondary antibody complexes as well as to the limits imposed by the imaging resolution, these  
169 results cannot determine if glutamate and GABA vesicular transporters are found on the same  
170 vesicles.

171

172 **Statistical features of synaptic currents generated by two models of glutamate/GABA co-**  
173 **release**

174 We considered two models that have been previously proposed regarding the mechanism  
175 of glutamate/GABA co-release in LHb: one in which the two neurotransmitters are packaged in  
176 separate vesicles but are released from the same terminal (Root et al., 2018) (termed the  
177 independent release model) and the other in which the two neurotransmitters are packaged in  
178 the same vesicles (Shabel et al., 2014) (termed the co-packaging release model) (Figure 2A).  
179 Under both scenarios the average PSCs produced by release from co-transmitting synapses,  
180 generated either by stimulating a single bouton many times or by pooling signals across many  
181 boutons, can appear identical. However, trial-by-trial analyses of synaptic currents resulting from  
182 stimulation of individual co-transmitting synapses differ in each model when vesicle release is  
183 stochastic (i.e. release probability,  $p_r$ , is  $<1$ ) (Figure 2A). Furthermore, in the independent release  
184 model, the maximum ( $i_{max}$ ) and minimum ( $i_{min}$ ) amplitudes are uncorrelated whereas in the co-  
185 packaging model, the amplitudes exhibit strong within-trial correlation (Figure 2B).

186 To determine the features that can distinguish the two models, we implemented a  
187 biophysical simulation of the PSCs generated by stochastic synaptic vesicle release under either  
188 the independent or the co-packaging model (see Methods). Scatter plots of the maximum and  
189 minimum amplitudes extracted from PSCs generated by simulation of the independent release  
190 model revealed a dispersed distribution with 4 clusters of different synaptic responses (Figure  
191 2C). In contrast, in the co-packaging release model, we observed 2 clusters with one  
192 corresponding to failure trials and one extending in a diagonal band that contains all the  
193 successful trials, consistent with the within-trial correlation between maximum and minimum  
194 amplitudes (Figure 2B). Moreover, clear differences are predicted by the two models in the  
195 population-level distributions of PSC amplitude maxima and minima when trials are grouped by  
196 failure and success, with the latter including EPSC-only trials, IPSC-only trials, and trials with both  
197 EPSCs and IPSCs (Figure 2C, see histograms along the top and right of each panel). In the co-  
198 packaging model, a clear separation is seen between failure and success trial maximum and  
199 minimum amplitudes (Figure 2C, *right*); whereas, in the independent release model, the

200 maximum and minimum amplitude histograms of success trials cover a broader range,  
201 overlapping with those of failure trials (Figure 2C, *left*).

202 We calculated three statistical features from the simulated datasets that quantify the  
203 qualitative differences described above. These features differ in the degree to which they rely on  
204 the ability to accurately detect the presence of an EPSC or an IPSC in each trial (i.e. to distinguish  
205 successes from failures). Below we use the maximum ( $i_{\max}$ ) and minimum ( $i_{\min}$ ) current during a  
206 defined window to refer to amplitudes of inhibitory and excitatory currents without judging if a  
207 release event has occurred (i.e. they may be due to noise). In contrast, we use IPSC and EPSC and  
208 their amplitudes to refer to the components of PSCs that were judged to be a success of GABA  
209 or glutamate release, respectively (i.e. the excitatory or inhibitory component rises out of the  
210 noise – see Methods).

211 First, we considered the probabilities of detecting PSCs with different components. This  
212 method determines the presence or absence of the EPSC and IPSC on each trial but does not  
213 consider amplitudes of the detected currents. The occurrence of two events (e.g. detecting an  
214 EPSC or an IPSC) are statistically independent if and only if the probability of the events occurring  
215 together, or the joint probability, is equal to the product of the probabilities of each occurring.  
216 We adopted this framework to test if the observed probabilities of occurrence of PSCs with EPSCs,  
217 IPSCs, or both are consistent with the results predicted by statistical independence. Thus, we  
218 tested if:

$$219 \quad p(E \cap I) = p(E)p(I)$$

220 where  $p(E)$  is the measured probability of detecting an EPSC,  $p(I)$  is the measured probability of  
221 detecting an IPSC, and  $p(E \cap I)$  is the measured probability of detecting a compound current in the  
222 same PSC (Figure 2D). As expected, only simulations of the independent release model generated  
223 a distribution of joint probabilities that matched the distribution of the products of the individual  
224 probabilities. Simulations of the co-packaging model produced a joint probability distribution  
225 shifted far right of the distribution predicted by independence probability theory (Figure 2D).

226 Second, we compared the histograms of PSC maximum and minimum amplitudes in trials  
227 grouped by the presence and absence of EPSCs and IPSCs (Figure 2E). This test examines if the  
228 minimum PSC amplitude distributions are the same whether or not an IPSC was detected in the



229 trial (“I” or “no I” trials, respectively). The converse – the PSC maximum amplitude distributions  
230 for EPSC and no EPSC containing trials (“E” or “no E trials”, respectively) – was also examined.  
231 Thus, we calculated four cumulative distribution functions (cdfs).

232 In the independent model, the four cdfs rise sharply near zero amplitude, indicating that  
233 a failure of glutamate or GABA release does not predict the failure of release of the other  
234 transmitter (Figure 2E). Furthermore, the cdfs of PSC amplitudes from the “I” vs. “no I” trials show  
235 only small differences, consistent with the presence or absence of an IPSC having only small  
236 effects on the minimum amplitude. Similar observations are made for comparisons of the  
237 maximum amplitude cdfs of “E” vs. “no E” trials. In contrast, in the co-packaging model, the “no  
238 E” and the “no I” cdfs are each shifted far left relative to the “E” and “I” cdfs, respectively,  
239 consistent with the presence or absence of the one current fully predicting the presence or  
240 absence of the other current. Although this assay requires detecting the presence of either the  
241 EPSC or the IPSC on each trial, it is robust to some errors in the accuracy of detection. In fact, the  
242 requirement of judging the presence or absence of either component can be relaxed and the  
243 same analysis can be performed by simply dividing the PSC into those with, for example, large  
244 and small amplitude IPSCs and asking if this influences the distribution of EPSC amplitudes  
245 (Supplemental Figure 2A). The relaxed requirement still produces distinguishable differences  
246 between the two models, demonstrating that, even if signal-to-noise (SNR) of recordings is low,  
247 our statistical tests are robust.

248 Third, we examined the correlation coefficients across trials of the PSC minimum and  
249 maximum amplitudes (Figure 2F). Correlation analysis was performed separately for all trials and  
250 for success trials to account for possible analysis artifacts resulting from inclusion of noisy failure  
251 trials. In the independent release model, the distributions of the correlations between maximum  
252 and minimum PSC amplitudes are consistently negative when calculated for all trials and for  
253 success trials (Figure 2F). The negative correlation arises from the overlap of the EPSC and IPSC  
254 and reflects the differences observed in Figure 2C. Moreover, the success-trials correlation  
255 distribution is more negative compared to that for the all-trials correlation due to the algorithmic  
256 removal of the failure trials which, by definition, have noise-generated uncorrelated positive and  
257 negative deflections. In contrast, simulation of the co-packaging model produces strong positive

258 correlations (essentially 1) for all-trials and for success-trials (Figure 2F). This high correlation  
259 results from (1) co-occurrence of successes and failures in EPSCs/IPSCs and (2) shared variance  
260 due to vesicle-to-vesicle size differences, which co-modulates the two opposing currents. In each  
261 case, null correlation distributions were computed by shuffling the maximum and minimum  
262 amplitudes across trials and, as expected, are centered at zero in both models (Figure 2F). This  
263 assay, when applied to all trials, does not require judging the presence or absence of either the  
264 EPSC or IPSC in each trial.

265

### 266 **DMD-based optogenetic stimulation to study glutamate/GABA co-release from EP *Sst+* axons**

267 Previous studies of glutamate and GABA co-transmission at EP-LHb synapses have used  
268 wide-field optogenetic to evoke neurotransmitter co-release from many EP terminals while  
269 measuring compound PSCs in LHb neurons (Root et al., 2018; Shabel et al., 2014; Wallace et al.,  
270 2017). This produces essentially one response per postsynaptic neuron and obscures potential  
271 differences between individual terminals. A stable and repeatable method to target defined  
272 synapses is essential to statistically compare the experimental data with the predictions  
273 generated from computational simulations described above. We implemented a digital  
274 micromirror device (DMD)-based optogenetic stimulation approach to activate glutamate/GABA  
275 co-releasing EP *Sst+* axon terminals in the LHb (Figure 3A). The goal was to separately activate  
276 many different terminals as quickly and in as many trials as possible. This allowed us to measure  
277 the variance of stochastic neurotransmitter release across time and at different synapses.  
278 Variants of this approach (CRACM and sCRACM) were used to map connectivity and the spatial  
279 arrangement of synapses in cortical circuits (Petreanu et al., 2009, 2007). We adapted this  
280 approach to target small sets, ideally consisting of an individual (see below, Figure 4), presynaptic  
281 terminals.

282 We first examined DMD-evoked responses at high laser powers that activate many  
283 synapses. We prepared acute coronal brain slices from LHb of *Sst-Cre* mice at least 4 weeks after  
284 bilateral stereotaxic injection of Cre-dependent AAV encoding the excitatory opsin OChIEF into  
285 the EP (Figure 3B, as in Figure 1A-B). The system enabled stimulation of 96 specific spatial targets,  
286 each a 23x28  $\mu\text{m}$  box, in less than 10 seconds (Supplemental Figure 3A). LHb neurons were held

287 in voltage-clamp mode at the reversal potentials of GABA<sub>A</sub>R (-70 mV) and AMPAR (0 mV) to  
288 isolate the excitatory and inhibitory PSCs, respectively (Figure 3C). In each neuron, a subset of  
289 the stimulation spots (252 of 576 spots, n=6 neurons; 16-68 of 96 spots per neuron) elicited  
290 synaptic currents. Over 80% of the spatial locations (204 of 252 spots) that evoked EPSCs also  
291 evoked IPSCs (Figure 3C-D). The amplitudes of EPSCs and IPSCs evoked at each spot were typically  
292 correlated in each cell but the IPSC/EPSC ratio (or slope of the correlation) varied from cell-to-  
293 cell (Figure 3F-G). The variability across different sets of synapses measured within the same cell  
294 was not due to differences in quality of voltage clamp (Supplemental Figure 3E-F). Nevertheless,  
295 there were spots that evoked EPSCs and IPSCs whose amplitude ratio was different than that of  
296 the other synapses onto the same cell (e.g. Figure 3C, dotted box), indicative of heterogeneity in  
297 the ratio of glutamatergic and GABAergic currents evoked by different synapses. The EPSC sizes  
298 of the “EPSC-only” spots and IPSC sizes of the “IPSC-spots” were significantly smaller than those  
299 of the “both” spots (Figure 3E), suggesting that the “EPSC-only” and “IPSC-only” sites might also  
300 contain IPSCs and EPSCs, respectively, that are below detection threshold.

301 Overall, these results are consistent with *Sst+* axons co-releasing and the post-synaptic  
302 cell being able to detect both transmitters. Control experiments to test the spatial specificity of  
303 DMD-based activation were performed, including examining the response pattern after moving  
304 the microscope objective by a known distance (Supplemental Figure 3B-C) and testing whether  
305 light leaks to nearby regions with increasing light intensity (Supplemental Figures 3D).

306 In a subset of cells, we examined if recordings at intermediate potentials ( $V_h = -27$  or  $-35$   
307 mV) could be used to monitor the EPSC and IPSC simultaneously. We observed biphasic  
308 responses following photo-stimulation of the same spots at which isolated EPSCs and IPSCs were  
309 detected at each reversal potential (Figure 3H; Figure 3C). Amplitudes of the inward and outward  
310 peaks in the biphasic responses were highly correlated, consistent with the biphasic responses  
311 representing the summation of two opposite signed synaptic currents (Figure 3I). However, the  
312 range of inward and outward peak amplitudes was smaller compared to the measurements made  
313 at the reversal potentials due to (1) the mutual occlusion of the EPSC and IPSC and (2) reduction  
314 in driving force of synaptic currents (slope change from 0.856 to 0.955;  $R^2$  change from 0.88 to  
315 0.75).

316

### 317 **Heterogeneity in unitary responses from EP *Sst+* co-releasing axons**

318 In order to compare experimental data to the statistical models, it is necessary to study  
319 responses at individual synapses. We modified the conditions of spatially-specific DMD-based  
320 optogenetic activation to generate minimal responses and call this approach DMOS – DMD-based  
321 minimal optogenetic stimulation. Whole-cell voltage-clamp recordings were performed in the  
322 presence of TTX and 4-AP to optogenetically activate pre-synaptic boutons without propagating  
323 action potentials (Figure 4A) (Petreanu et al., 2009). Furthermore, we tested a variety of  
324 stimulation intensities and spot sizes until we achieved EPSCs whose amplitudes were similar to  
325 those of miniature spontaneous EPSCs (mEPSCs) and that appeared stochastically trial-to-trial.  
326 Under these conditions, fewer of the stimulation spots evoked PSCs even when maximizing  
327 detection of inward currents ( $V_h = -64$  mV, Figure 4B).

328 Similarly, we performed whole-cell voltage-clamp recordings at an intermediate holding  
329 voltage, -35mV or -27mV, at which both EPSCs and IPSCs could be observed while minimally  
330 stimulating EP *Sst+* axons with TTX and 4-AP in bath. In each recording, we started with high  
331 intensity photo-stimulation and then lowered the light intensity until the DMOS-evoked PSC  
332 events became stochastic. These minimally-evoked PSCs were biphasic and the evoked EPSC  
333 (eEPSC) and IPSC (eIPSC) components had amplitudes similar to those of spontaneous EPSCs  
334 (sEPSC) and IPSCs (sIPSC) measured from all the recorded neurons, respectively (Figure 4C; Figure  
335 4D) (the median and interquartile range (IQR) of amplitudes in pA for each current were: eEPSC:  
336 4.0 (IQR 6.0); sEPSC: 3.4 (IQR 3.8); eIPSC: 5.4 (IQR 3.3); sIPSC: 9.7 (IQR 8.7)).

337 We found three types of evoked unitary PSCs (uPSCs) using the DMOS approach. In each  
338 terminal, across hundreds of trials, we either observed “EPSC-only” (left), “IPSC-only” (right), or  
339 “both” (middle) hotspots that revealed only EPSCs, only IPSCs, or both EPSC and IPSCs,  
340 respectively, on every success trial (Figure 4E). Overall, the majority (~64%) of all uPSC hotspots  
341 (44 spots from 14 cells; 1-7 hotspots per cell with median of 2.5) exhibited both EPSCs and IPSCs,  
342 consistent with the co-packaging model (Figure 4F; Supplemental Figure 4C). This result was not  
343 affected by changing the detection threshold of EPSCs and IPSCs (Supplemental Figure 4B,D). We  
344 hypothesized that some of the “EPSC-only” and “IPSC-only” uPSCs result from occlusion rather

345 than a true lack of IPSC and EPSC, due to reduction of ion channel driving forces at an  
346 intermediate holding voltage. Indeed, the relative proportion of “IPSC-only” hotspots increased  
347 to 34% (from 2/21 hotspots to 10/23 hotspots in 7 cells in each group, fisher’s test  $p = 0.0174$ )  
348 when the holding voltage was increased from -35 to -27 mV, suggesting that competition of  
349 opposing currents generated by EPSCs and IPSCs limits the detection of both signals (Figure 4F).  
350

### 351 **Examples of unitary responses that support independent and co-packaging models.**

352 We investigated the three statistical features outlined above (Figure 2) for responses that  
353 showed “both” uPSCs. Note that the common failure modes of our analyses will artificially  
354 support a model of independent release of glutamate and GABA. For example, noise in the  
355 electrical recording that is incorrectly labeled as an evoked EPSC or IPSC, high spontaneous  
356 miniature spontaneous EPSC and IPSC (mEPSC/mIPSC) rates that result in spontaneous events  
357 being mislabeled as evoked, or activation of multiple terminals within a single stimulation spot  
358 will all tend to make co-packaging synapses appear as independently-releasing synapses.

359 Among DMOS-activated spots that generated biphasic PSCs, we found examples  
360 consistent with independent (Figure 5A-E) as well as co-packaging (Figure 5F-J) models based on  
361 the three statistical features described above. At sites consistent with independent release (e.g.  
362 Figure 5A), heterogeneous shapes of PSCs were observed across trials with minimum amplitude  
363 peaks ( $i_{\min}$ ) typically preceding maximum amplitude peaks ( $i_{\max}$ ) (Figure 5A), as expected for  
364 evoked EPSCs and IPSCs as opposed to noise. A scatter plot of  $i_{\min}$  and  $i_{\max}$  amplitudes (Figure 5B)  
365 revealed a dispersed pattern with a negative slope consistent with the independent model  
366 (compare with Figure 2C). Furthermore, a bootstrapped ( $n=10,000$ ) probability distribution of  
367 detecting both  $i_{\min}$  and  $i_{\max}$  amplitudes in single trials was not different from that expected by  
368 chance (Figure 5C) and matched the probabilities generated when the natural paired relationship  
369 between the  $i_{\min}$  and  $i_{\max}$  was broken by shuffling one relative to the other (Figure 5C).  
370 Furthermore, we simulated ( $n=500$  runs) the biophysical models of two different modes of co-  
371 release using the parameters (i.e. the number of trials,  $p(E)$ , and  $p(I)$ ) measured from the data  
372 collected in Figure 5A-B with an assumption of high SNR. The distributions of the joint probability  
373 of detecting an EPSC and IPSC together matched that generated by the independent model

374 (Figure 5C, *top*), and was clearly different from that generated by the co-packaging model (Figure  
375 5C, *bottom*). Similarly, cdfs of the minimum amplitudes in trials with or without an IPSC showed  
376 no difference (Figure 5D), more consistent with the independent release model prediction (Figure  
377 2E). The same was true for the maximum amplitude cdfs. Finally, bootstrapped ( $n=10,000$ )  
378 correlation distributions of maximum and minimum amplitude pairs were centered around zero  
379 for all-trials and slightly negative for success-trials (Figure 5E). Thus, this example of synaptic  
380 responses generated by DMOS-stimulation of one site 145 times are best described by a model  
381 of independent release of glutamate and GABA. It is unclear if this conclusion reflects true  
382 independent release and detection of glutamate and GABA at a single synapse, or potentially  
383 results from the confounds listed above such as the presence of both a glutamate-only and a  
384 GABA-only synapse in the illuminated site.

385 At sites consistent with co-packaging, all successful event traces consisted of biphasic  
386 PSCs (Figure 5F). The scatter plot of the minimum and maximum amplitude pairs exhibited a  
387 positive correlation, with failures and success trials continuously spanning the diagonal axis of  
388 the distribution cloud (Figure 5G; compare with Figure 2C). The bootstrapped ( $n=10,000$ )  
389 probability distribution of detecting both an EPSC and IPSC was significantly greater ( $p < 1e-3$ )  
390 than the random distribution predicted by chance co-occurrence of an EPSC and IPSC (Figure 5H).  
391 The difference between the distributions disappeared when the EPSCs and IPSCs amplitudes  
392 were separately shuffled across trials. Furthermore, in agreement with the increased probability  
393 of detecting both EPSCs and IPSCs in single trials, this data was best fit by simulations of the co-  
394 packaging model rather than the independent model. In addition, cdfs of the minimum or  
395 maximum PSC amplitudes were well-separated when comparing across trials categorized by the  
396 absence vs. presence of an IPSC or EPSC, respectively (Figure 5I; compare with Figure 2E). Lastly,  
397 bootstrapped ( $n=10,000$ ) trial-by-trial minimum and maximum amplitudes exhibited a large  
398 positive correlation for all trials and slightly smaller positive correlation for success trials (Figure  
399 5J; compare with Figure 2F). The observed correlation of minimum and maximum amplitude pairs  
400 was not due to fluctuations of the stimulation intensity (Supplemental Figure 5A). Hence, our  
401 dataset contains example PSCs consistent with co-packaging of glutamate and GABA in the same  
402 vesicle, a conclusion that is difficult to arise artificially due to limitations of the methodology.

403

404 **Unitary responses of co-transmitting subtypes are consistent with the co-packaging release**  
405 **model**

406 We performed the same analysis as above for each spot (n=28 from 11 cells) that  
407 exhibited DMOS-evoked biphasic PSCs. For each spot we performed the full analyses depicted in  
408 Figure 5A-E, including bootstrap-calculated distributions and comparison to simulation results  
409 generated by independent and co-packaging release models using the parameters tailored to  
410 each synapse. To quantify how much each statistical feature supported either model, a “model  
411 feature indicator” was parametrized to quantitatively capture the distribution differences  
412 described above (see Methods). In each case we compared the shift in the 50% value (i.e. the  
413 median) of two cdfs ( $\Delta\text{cdf}_{0.5}$ ), one presenting the data itself (or a distribution of bootstrapped  
414 data) and the other representing the equivalent cdf expected from chance observations of  
415 independent glutamate and GABA release (Figure 6A). This process resulted in 5 model feature  
416 indicators that summarize the deviation from random of each of the following: **1**, The joint  
417 probability of observing an EPSC and IPSC in the same trace; **2** and **3**, The influence of the  
418 presence or absence of an EPSC (2) or IPSC (3) on the amplitude of the IPSC (2) or EPSC (3); **4** and  
419 **5**, The correlation coefficients of  $i_{\min}$  and  $i_{\max}$  in each trial considering all trials (4) or success-only  
420 trials (5).

421 Extremes values (i.e. near -1 or 1 except for the IPSC/EPSC joint occurrence probability  
422 feature which ranges between 0 and 1) of parameters indicated that categorization is strongly fit  
423 by either the co-packaging or independent release model. In contrast, values closer to zero  
424 reflected that the categorization was uncertain (Figure 6B). Unfortunately, the source of  
425 variations observed between -1 and 0 (i.e. those strongly fit by the independent model) is elusive  
426 as experimental errors can make co-packaging sites appear independent (see above and  
427 Discussion). As our study was designed to test if any synaptic responses were statistically  
428 compatible with co-packaging of glutamate and GABA, the model feature indicators were  
429 transformed to range from 0 (ambiguous or consistent with independent model release) to 1  
430 (high confidence for co-packaging model) on the model axis (see Methods). The transformed  
431 model feature indicator heatmap of all sites revealed column-like structure (Figure 6C), indicating



432 that the five statistical features captured in the model feature indicators are consistent as a group  
433 in their degree of support for the co-packaging release model (Supplemental Figure 6A). Using  
434 this metric, 22 of 28 sites had feature average greater than 0 (mean = 0.253, range 0.0057 ~ 0.722)  
435 (Figure 6D).

436 As described above, the failure mode of our analyses is to favor the independent release  
437 model and false evidence for this model can result from high current noise, high spontaneous  
438 mEPSC/mIPSC rates, or the presence of multiple release sites in a single DMOS activated spot.  
439 To systematically investigate how these factors contribute to our results, we considered three  
440 noise metrics (Figure 6E). The quality of recording was captured by measuring the variance of the  
441 baseline current estimated from a gaussian fit. In addition, the impact of spontaneous  
442 mEPSC/mIPSC rates on the scatter distribution of observed trial-by-trial maximum and minimum  
443 amplitudes was measured. Lastly, we quantified the varying level of receptor saturation or  
444 kinetics across cells reflected in the spontaneous synaptic activity. Qualitative comparison  
445 between an example of an ambiguous site and a strongly supported co-packaging site (Figure 6F)  
446 revealed two major differences: (1) the separation between amplitudes of the spontaneous  
447 activity and those of minimum and maximum evoked currents; and (2) the SNR of evoked EPSC  
448 and IPSC amplitudes, which was calculated by comparing evoked EPSC/IPSC amplitudes to the  
449 EPSC/IPSC detection threshold limited by the baseline current noise.

450 At a population level, there was an inverse relationship between the degree of support  
451 for the co-packing model and the rate of spontaneous EPSCs/IPSCs, as judged by the fraction of  
452 outlier (i.e. 3x scaled median absolute deviation (MAD)) values in the holding current when no  
453 stimulus was delivered (Figure 6G; Pearson correlation coefficient = -0.44;  $p = 0.175$ ).  
454 Furthermore, the average SNR of evoked currents was positively correlated (Pearson correlation  
455 coefficient = 0.47;  $p = 0.0112$ ) with model feature indicator. Therefore, the sites with the best  
456 recording quality (low noise and low spontaneous synaptic events) had greater support for the  
457 co-packaging release model. This suggests that confounds of recording conditions may underlie  
458 the existence of sites that support the independent model or were ambiguous, such that most,  
459 if not all, co-transmitting sites might reflect synapses at glutamate and GABA are co-packaged.



460

461 **Pharmacological perturbation reveals co-packaging of glutamate and GABA in individual**  
462 **vesicles**

463 A strong test of the co-packaging model is to examine if the correlations between  
464 glutamatergic and GABAergic currents (either their amplitude or simply their presence and  
465 absence) remain when probability of release is lowered. If both transmitters are in the same  
466 vesicle, then the co-occurrence of evoked inward and outward currents should persist when  
467 probability of release lowered. In contrast, if release of each transmitter is independent, then a  
468 2-fold reduction of release probability should reduce the probability of biphasic currents 4-fold.  
469 Equivalently, if release is independent and lowered 2-fold, the detection rate of an IPSC when in  
470 a trial in which an EPSC is detected should fall 2-fold.

471 Serotonin reduces the probability of glutamate and GABA release from the EP axons in  
472 the LHb (Shabel et al., 2014, 2012) but it is unknown if serotonin has a similar effect on EP *Sst+*  
473 axons or equally on glutamatergic and GABAergic transmission. We examined the effect of  
474 serotonin (5-HT) on PSCs in LHb neurons resulting from activating groups of EP *Sst+* synapses  
475 (Figure 7A). We delivered an optogenetic ring stimulation using the DMD to evoke  
476 neurotransmitter release mediated by propagating action potentials and thus avoid direct  
477 activation of terminals synapsing onto the recorded neuron. This elicited composite excitatory  
478 and inhibitory PSCs in all cells (Figure 7B) (EPSC median (IQR) = 371.7 pA (385.7 pA); IPSC median  
479 (IQR) = 413.4 pA (423.6 pA); n = 6 cells, 5 animals), which were blocked by TTX (1  $\mu$ M) and not  
480 recovered by 4-AP (400  $\mu$ M), consistent with being evoked by propagating action potentials. Bath  
481 application of 5-HT (1  $\mu$ M) reduced inward and outward currents in most cells (5 out of 6 for EPSC;  
482 6 out of 6 for IPSC; unpaired t-test 5% significance level) (mean reduction:  $19.6 \pm 5.39\%$  (EPSC),  
483  $40.9 \pm 3.08\%$  (IPSC); Supplemental Figure 7A), consistent with 5-HT mediated reduction of both  
484 glutamatergic and GABAergic release from EP *Sst+* axons in the LHb. These reductions in  
485 compound current amplitudes reflect the pooled effects of 5-HT on glutamate-only, GABA-only,  
486 and glutamate/GABA co-transmitting synapses (as in Figure 3).

487 To test whether 5-HT modulates biphasic PSCs resulting from activation of individual EP  
488 *Sst+* terminals, we examined the effects of 5-HT on DMOS-evoked hotspots with characteristics

489 consistent with the co-packaging model (Figure 7C). Application of a low concentration of 5-HT  
490 (0.25  $\mu$ M) reduced both inward and outward current amplitudes of average biphasic PSCs (Figure  
491 7D, Supplemental Figure 7B; mean reduction:  $45.4 \pm 8.08\%$  ( $-i_{\min}$ );  $63.2 \pm 4.18\%$  ( $i_{\max}$ ); mean  
492 number of trials:  $123 \pm 8.91$ ;  $n = 6$  spots, 6 cells, 6 animals). Trial-by-trial analysis indicated that,  
493 prior to 5-HT application, successful release trials consisted of biphasic PSCs with inward current  
494 followed by outward current (Figure 7E), consistent with earlier results (Figure 5F). Moreover,  
495 distributions of trial-by-trial maximum and minimum amplitude peaks and the three statistical  
496 features were consistent with those predicted by the co-packaging model (Figure 7F,H; Figure 5F-  
497 J). 5-HT reduced probability of success trials (mean reduction:  $20.3 \pm 4.94\%$ , unpaired t-test  $p <$   
498  $1e-3$ ), probability of detecting EPSC (mean reduction:  $22.9 \pm 5.22\%$ ,  $p < 1e-3$ ), IPSC (mean  
499 reduction:  $30.3 \pm 5.15\%$ ,  $p < 1e-3$ ), and both (mean reduction:  $32.9 \pm 3.45\%$ ,  $p < 1e-3$ ) (Figure 7J,L;  
500 Supplemental Figure 7C). Thus, 5-HT reduces both GABA and glutamate release from individual  
501 terminals that appear to package both transmitters in individual vesicles.

502 The distributions of  $i_{\min}$  and  $i_{\max}$  amplitudes spanned similar ranges before and after 5-HT  
503 bath application (Figure 7F,J). Waveforms and the cdfs of the  $i_{\min}$  and  $i_{\max}$  amplitudes of the “both”  
504 success trials were comparable (Figure 7G,K) and the bootstrapped Kolmogorov-Smirnov (K-S)  
505 tests (10,000 times) indicated no significant difference between the two groups (mean  $i_{\min}$ : 13.5  
506 pA (before), 10.4 pA (after); mean  $i_{\max}$ : 14.8 pA (before), 13.36 pA (after); number of trials: 52  
507 (before), 25 (after);  $p = 0.4804$  ( $i_{\min}$ ),  $p = 0.6891$  ( $i_{\max}$ ); Supplemental Table 1). In the same dataset,  
508 cdfs of the  $i_{\min}$  and  $i_{\max}$  amplitudes of all success trials were not significantly different (mean  $i_{\min}$ :  
509 9.30 pA (before), 7.02 pA (after); mean  $i_{\max}$ : 9.55 pA (before), 6.54 pA (after); number of trials:  
510 94 (before), 72 (after); Supplemental Table 1). Only two out of six cells had significantly different  
511 cdfs of  $i_{\min}$  amplitudes and only one out of six cells had a significant  $i_{\max}$  cdf difference  
512 (Supplemental Table 1) in the “both” success trials. Thus, the major effect of 5-HT on DMOS-  
513 evoked uPSCs is to reduce probability of release; however, 5-HT may have additional effects on  
514 post-synaptic receptor opening (i.e. synaptic potency).

515 To specifically test if the correlation between glutamate and GABA receptor currents was  
516 maintained after 5-HT application as predicted for the co-packaging model, we developed an  
517 alternative test that uses paired data from the basal and drug condition but does not require

518 sorting trials into successes and failures. We compared the distribution of  $i_{\min}$  and  $i_{\max}$  amplitudes  
519 in trials sorted and binned by  $i_{\min}$  amplitude – i.e., the 5 trials with largest  $i_{\min}$  in group 1, the next  
520 5 largest in group 2, etc... A positive correlation of the binned distributions of  $i_{\min}$  and  $i_{\max}$   
521 confirmed that these sites were consistent with the co-packaging model (Pearson correlation  
522 coefficient = 0.893 (before), 0.817 (after) ;  $p < 0.001$  (before and after)) (Figure 7M; Supplemental  
523 Figure 7D). Co-packaging vs. independent release models make different predictions of the effect  
524 of 5-HT on this relationship. In the former, assuming no change in synaptic potency, the range of  
525 the data and slope of the relationship showed remain unchanged; indeed, this was the effect  
526 observed in the example site (Figure 7M). If there is an additional change in synaptic potency,  
527 the relationship should scale along the diagonal whereas, if the effects are differential on  
528 glutamate and GABA receptors, the relationship should change slope. In contrast, in an  
529 independent release model in which the pre-5-HT consistency with co-packing arose by chance,  
530 the relationship should be randomized after 5-HT or possibly reveal a negative correlation  
531 reflecting the mutual occlusion of excitatory and inhibitory synaptic currents (Figure 7N).

532 Overall, we found that, after 5-HT application, the binned  $i_{\min}$  vs.  $i_{\max}$  distribution  
533 maintained the correlation slope in 3 out of 6 spots (Supplemental Figure 7D1, D4, and D6). In the  
534 remaining the three spots, a correlation was maintained but the data shifted, consistent with  
535 larger effect on the  $i_{\max}$  (i.e. IPSC amplitude) distribution (Supplemental Figure 7D2, D3, and D5).  
536 Such effects could arise from a larger effect on potency of GABAergic vs. glutamatergic currents  
537 or reflect AMPA receptor saturation in the larger excitatory currents.

538 In addition, after 5-HT bath application, the three statistical features in all sites continued  
539 to support the co-packaging model (Figure 7H,L; Figure 7O;  $n = 6$  out of 6 spots). In all cases the  
540 mean model indicator value continued to be positive and support co-packaging. Nevertheless,  
541 the mean model indicator decreased on average by  $-0.33 \pm 0.07$  (Supplemental Table 1), as  
542 expected from a reduction of SNR due to effects on synaptic potency or increases baseline noise  
543 and run down of synaptic currents that invariably occurs during long recordings. Indeed, model  
544 indicator values pooled from two conditions were strongly correlated with the ratio of the  
545 average PSC amplitude and current noise level of the individual spots (Pearson correlation  
546 coefficient = 0.74,  $p = 0.0063$ ) (Figure 7P). Importantly, changes in the release probability,

547 baseline noise, and PSC amplitude in “both” success trials accounted for the observed changes in  
548 model indicator value (Pearson correlation coefficient = 0.70,  $p = 0.12$ , norm of residuals of fit =  
549 0.29) (Figure 7Q). These results demonstrate that 5-HT reduces release probability of both  
550 glutamate and GABA from EP *Sst+* inputs to the LHb and that terminals with features consistent  
551 with co-packaging continue to exhibit these features after reductions in probability of release.

## 552 **Discussion**

553 Here we describe a novel experimental and statistical analysis approach to test distinct  
554 mechanistic models of neurotransmitter co-transmission. The approach is generally applicable to  
555 study synapses at which co-transmission is thought to occur and we apply it to examine  
556 glutamate/GABA co-transmission at EP *Sst+* terminals in LHb. We identify three statistical  
557 features that differentiate between computational models, one in which glutamate and GABA  
558 are released independently and another in which they are packaged in the same synaptic vesicle.  
559 Experimental data collected by activating individual pre-synaptic terminals reveal heterogeneity  
560 in neurotransmitter co-transmission. Nevertheless, we demonstrate examples of synapses that,  
561 when repetitively activated by minimal optogenetic stimulation, generate PSCs whose properties  
562 are consistent with co-packaging of glutamate and GABA and incompatible with independent  
563 release of each transmitter. Furthermore, pharmacological perturbations confirm that the  
564 statistical properties expected from co-packaged release of glutamate and GABA are preserved  
565 when release probability is lowered. Lastly, analysis of the contributions of synaptic noise and  
566 recording quality suggest that many synapses labeled as more consistent with independent  
567 release of glutamate and GABA, may actually reflect co-packaged release but with the expected  
568 correlations between glutamatergic and GABAergic currents obscured by noise. Thus, we  
569 conclude that EP *Sst+* neurons package both glutamate and GABA into the same vesicles and  
570 release these to activate correlated excitatory and inhibitory currents in LHb neurons. These  
571 findings have important implications for the plasticity mechanisms employed at this synapse, the  
572 relationship between activity in the EP and LHb, and maladaptive states known to induce  
573 plasticity in the circuit such as chronic stress, depression, and addiction.

574

575 **EP *Sst+* axons form glutamate/GABA co-releasing synapses in LHb**

576 Here we exploited a *Sst-Cre* transgenic mouse to exclusively focus on glutamate/GABA  
577 co-releasing projections from EP to LHb. We found enrichment of the glutamate and GABA  
578 vesicular transporters, Vglut2 and Vgat, respectively, in EP *Sst+* terminals. High covariance of  
579 expression of these two pre-synaptic proteins agrees with analyses using immunogold electron  
580 microscopy that supports the conclusion that glutamate and GABA are released from EP and  
581 other terminals in the LHb (Root et al., 2018; Shabel et al., 2014). Curiously, we find that post-  
582 synaptic scaffolding protein Gephyrin, but not PSD95, is highly enriched near EP *Sst+* terminals  
583 despite the clear glutamatergic nature of these boutons (Li et al., 2011; Maroteaux and Mameli,  
584 2012). This may indicate that, in contrast to glutamatergic terminals in cerebral cortex and  
585 hippocampus, an alternative MAGUK protein forms the core of these post-synaptic terminals. A  
586 positive correlation between Vglut2 expression and that of Synapsin-1 and PSD95 globally (i.e. in  
587 all terminals in LHb) (Figure 1G) indicates the existence of other molecularly distinct  
588 glutamatergic synapses in LHb (Barker et al., 2017; Hu et al., 2020; Knowland et al., 2017;  
589 Stamatakis et al., 2016).

590 The existence of glutamate and GABA co-packaging vesicles had been initially proposed  
591 following the observation of biphasic spontaneous miniature synaptic currents in LHb neurons  
592 (Shabel et al., 2014). However, the source of these biphasic miniature responses detected in LHb  
593 neurons were unknown since LHb receives projections that release glutamate and GABA from  
594 several brain regions (Barker et al., 2017; Stamatakis et al., 2016), including the ventral-tegmental  
595 areas (VTA) (Root et al., 2018, 2014). Based on our data, we propose that EP *Sst+* terminals are  
596 the source of synaptic vesicles that co-package glutamate and GABA. Interestingly, although the  
597 VTA also sends glutamate/GABA co-releasing axons to LHb, these are thought to release each  
598 transmitter from a separate pool of vesicles (Root et al., 2018).

599 Previous studies examined EP to LHb projections from the perspective of cellular  
600 physiology, anatomy, behavior, and disease models (Meye et al., 2016; Root et al., 2018; Shabel  
601 et al., 2014, 2012; Stephenson-Jones et al., 2016) using electrical stimulation or bulk  
602 channelrhodopsin activation of molecularly undefined, Vglut2+, or Vgat+ EP inputs in LHb.  
603 However, EP to LHb projections consist of two distinct neural populations that both normally  
604 express *Slc17a6* (encoding Vglut2) and hence express Cre in Vglut2-Cre (*Slc17a6-Cre*) mice. One

605 population is *Sst+*, the glutamate and GABA co-releasing population studied here, and the other  
606 is Parvalbumin positive (*Pvalb+*) and purely glutamatergic (Wallace et al., 2017). Hence, these  
607 previous studies likely examine the structure and function of axons in LHb arising from both  
608 populations.

609

### 610 **Function of the EP, LHb, and co-release**

611 LHb-projecting EP neurons, which include both *Pvalb+* and *Sst+* neurons, receive inputs  
612 from limbic-associated striosomes in the striatum (Wallace et al., 2017) and their firing rate is  
613 increased by aversive outcomes and decreased by rewarding outcomes (Hong and Hikosaka,  
614 2008; Stephenson-Jones et al., 2016). Stimulation of all LHb-projecting EP neurons is aversive and  
615 impacts evaluation of action-outcome, thereby biasing future choices (Shabel et al., 2012;  
616 Stephenson-Jones et al., 2016), although it remains to be determined whether these populations  
617 contribute sufficiently to drive this effect (Lazaridis et al., 2019). Importantly, EP *Vgat+* neurons  
618 that project to LHb (putative *Sst+* neurons) preferentially target LHb neurons projecting midbrain  
619 GABAergic neurons (Meye et al., 2016), suggesting a function of EP *Sst+* neurons regulating the  
620 dopamine system. Since increased LHb activity can have aversive and reinforcing effects (Lammel  
621 et al., 2012; Proulx et al., 2014; Stamatakis and Stuber, 2012), the net ratio of glutamate and  
622 GABA released from EP *Sst+* terminals may determine the behavioral consequence resulting from  
623 modulation of these cells.

624 EP *Sst+* inputs transmit with similar ratio of glutamate/GABA currents to the same  
625 postsynaptic LHb neuron (Figure 3F) but it is unclear whether a pre- or post-synaptic mechanism  
626 underlies this phenomenon. Interestingly, the glutamate/GABA current ratio differs across  
627 different post-synaptic LHb neurons (Figure 3G), suggesting that each post-synaptic LHb neuron  
628 can integrate a unique combination of information from the same set of EP *Sst+* inputs by  
629 separately varying numbers of glutamate and GABA synaptic receptors. We speculate that  
630 glutamate and GABA co-transmission achieved by co-packaging in the same vesicles with post-  
631 synaptic variability in numbers of glutamate and GABA receptors allows each LHb neuron to use  
632 graded and signed synaptic weights assign to its inputs the combination of weights that best  
633 predicts an aversive outcome. Thus, negative weights are assigned to inputs whose activity

634 coincides with or predicts a good outcome and positive weights are assigned to those associated  
635 with bad outcomes.

636

### 637 **Technical concerns involving study of glutamate/GABA co-release**

638 The success of our analysis method depends on the SNR of the recording and the ability  
639 of the algorithm to detect glutamate or GABA-mediated currents with differing kinetics and  
640 amplitudes. The performance of the algorithms and the power of the models depend on the  
641 EPSC/IPSC transmission ratio and receptor kinetics and degrade with increasing spontaneous  
642 synaptic activity, baseline noise, electronic noise, and numbers of active terminals within an  
643 optogenetic stimulation spot. These factors tend to make co-packaging synapses appear as  
644 independent synapses. Indeed, our study finds that the likelihood of individual unitary response  
645 hotspots being categorized as co-packaging synapse is anticorrelated with level of spontaneous  
646 synaptic input firing level and correlated with average EPSC/IPSC SNR of the synapse (Figure 6E-  
647 G).

648 In this study, the ability to detect glutamate and GABA release depends on the expression  
649 of ionotropic receptors for each transmitter in the post-synaptic terminal associated with the  
650 stimulated bouton. Therefore, we are unable to state if synapses in which we observe only  
651 glutamate or only GABA mediated currents reflect terminals that release only one transmitter or  
652 post-synaptic terminals that are exposed to both transmitters but lack one of the receptor classes.  
653 Furthermore, given the small size of unitary synaptic currents and the ability of excitatory and  
654 inhibitory currents to occlude each other, in some glutamate-only or GABA-only spots it is  
655 possible that the missing current was simply hidden.

656 A possible source of error that could make independent sites appear as co-packaging sites  
657 is large variability in stimulation intensity that drives the correlation of amplitudes observed  
658 across trials. In this case the stimulation intensity would have to vary sufficiently to stochastically  
659 excite one or a small set of synapses that independently release glutamate and GABA, but do so  
660 with probability of release near 1. To test for this possibility, we measured the DMOS photo-  
661 stimulation intensity and demonstrated that trial-to-trial variations in stimulation intensity are



662 small (<1%) and uncorrelated with the categorization of each trial as success or the amplitude of  
663 the EPSC and IPSC in a given trial (Supplemental Fig 5B).

664

### 665 **Serotonin modulation of glutamate and GABA co-releasing neurons**

666 Application of serotonin reduces the amplitude of glutamatergic and GABAergic currents  
667 evoked in LHb neurons by stimulation of EP *Sst+* axons. This is consistent with previous findings  
668 that showed serotonin reduces the probabilities of glutamate and GABA release from EP (Shabel  
669 et al., 2014, 2012). We find that in synapses that co-package glutamate and GABA, the effects of  
670 5HT are through largely mediated by a decrease in the probability of release of these vesicles  
671 with a potential additional effect on synaptic potency. 5HT receptor subtype 1B (5HTR<sub>1B</sub>)  
672 expressed in EP *Sst+* neurons likely mediates the presynaptic effect (Hwang and Chung, 2014;  
673 Wallace et al., 2017).

674 Serotonin signaling in LHb has been investigated in context of depression and its  
675 treatment. In animal models of depression, presynaptic changes have been described that shift  
676 the ratio of EP-to-LHb glutamatergic to GABAergic transmission, and this effect is reversed by  
677 treatment with selective serotonin reuptake inhibitor (SSRI)-type antidepressants (Shabel et al.,  
678 2014). Although our results suggest that the short-term effect of 5-HT is to inhibit release from  
679 *Sst+* inputs in LHb, longer-term additional effects of 5-HT on glutamate/GABA co-packaging  
680 vesicles remain unknown.

681 The interdisciplinary approach demonstrated here can be used to examine other co-  
682 transmitting synapses in the central nervous system to gain a richer understanding of all forms  
683 of neurotransmitter co-release.

684

### 685 **STAR Methods**

#### 686 **Mice**

687 *Sst-Cre* (Jackson Labs #013044; MGI #4838416) homozygous and heterozygous mice (C57BL/6;  
688 129 background) were bred with C57BL/6J mice. Both sexes of mice between 2-6 months in age  
689 were used. All animal care and experimental manipulations were performed in accordance with



690 protocols approved by the Harvard Standing Committee on Animal Care following guidelines  
691 described in the US NIH *Guide for the Care and Use of Laboratory Animals*

692

### 693 **Viruses**

694 To achieve specific expression of light-gated cation channel in the *Sst+* population in EP, we  
695 used a Cre-dependent adeno-associated virus (AAV) that encodes oChIEF, a variant of  
696 channelrhodopsin (Lin et al., 2009), driven by the EF1a promoter (AAV8-EF1a-DIO-  
697 oChIEF(E163A/T199C)-P2A-dTomato-WPRE-BGHpA). The plasmid was commercially obtained  
698 from Addgene (#51094) and the AAV was packaged by Boston Children's Hospital Viral Core.  
699 For intracranial injections, the virus was diluted to a titer of  $\sim 9 \times 10^{12}$  gc/ml.

700

### 701 **Intracranial Virus Injections**

702 Adult mice (>P50) were anesthetized with 2-3% isoflurane. Under the stereotaxic frame (David  
703 Kopf Instruments), the skull was exposed in aseptic conditions and the virus was injected  
704 bilaterally into the EP (coordinates: -1.0mm A/P, +/- 2.1mm M/L, and 4.2mm D/V, from  
705 bregma) through a pulled glass pipette at a rate of 50 nl/min with a UMP3 microsyringe pump  
706 (World Precision Instruments). 150 nl was infused per injection site. At least 4 weeks passed  
707 after virus injection before experiments were performed.

708

### 709 **Array Tomography**

710 Mice injected with AAV(8)-CMV-DIO-Synaptophysin-YFP in EP were deeply anesthetized,  
711 perfused transcardially with room temperature phosphate-buffered saline (PBS) followed by 4%  
712 paraformaldehyde (PFA) in PBS. The brain was removed from the skull, post-fixed overnight at  
713 4°C in 4% PFA, rinsed and stored in PBS. 250  $\mu$ m thick coronal sections were cut with a Leica  
714 VT1000s vibratome. Sections containing the habenula with high Synaptophysin-YFP expression  
715 were noted using an epifluorescence microscope, and approximately 0.5  $\times$  0.5 mm squares of  
716 tissue were cut out under a dissecting scope with Microfeather disposable ophthalmic scalpels.  
717 These small tissue squares were then dehydrated with serial alcohol dilutions and infiltrated  
718 with LR White acrylic resin (Sigma Aldrich L9774), and placed in a gel-cap filled with LR White to

719 polymerize overnight at 50°C. Blocks of tissue were sliced on an ultramicrotome (Leica EM UC7)  
720 into ribbons of 70 nm sections.

721

722 Antibody staining of these sections was performed as described previously (Saunders et al.  
723 2015). Briefly, antibodies were applied across multiple staining sessions (up to three antibodies  
724 per session) and a fourth channel left for DAPI. Typically, Session 1 stained against YFP (chicken  
725  $\alpha$ -GFP, GTX13970, GeneTex), Gephyrin (mouse  $\alpha$ -Gephyrin, 612632, Biosciences Pharmingen),  
726 and Synapsin-1 (rabbit  $\alpha$ -Synapsin-1, 5297S, Cell Signaling Tech); Session 2 for PSD-95 (rabbit  $\alpha$ -  
727 PSD95, 3450 Cell Signaling Tech.); Session 3 for Vgat (mouse  $\alpha$ -VGAT, 131 011 Synaptic  
728 Systems), and VGLUT2 (rabbit  $\alpha$ -VGLUT2, 135 403 Synaptic Systems). In one sample the  
729 staining order was reversed, and revealed that order-dependent differences in staining quality  
730 did not alter the analysis. Each round of staining was imaged on a Zeiss Axio Imager upright  
731 fluorescence microscope before the tissue ribbons were stripped of antibody and re-stained for  
732 a new imaging session. Four images were acquired with a 63x oil objective (Zeiss) and stitched  
733 into a single final image (Mosaix, Axiovision). Image stacks were processed by aligning in Fiji  
734 with the MultiStackReg plug-in, first on the DAPI nuclear stain and with fine alignments  
735 performed using the Synapsin 1 stack. Fluorescence intensity was normalized across all  
736 channels, such that the top and bottom 0.1% of fluorescence intensities were set to 0 and  
737 maximum intensity, respectively.

738

739 Image analysis was performed as described previously (Granger et al. 2020). Pre-processing  
740 steps included trimming the image edges and masking out regions that correspond to cell nuclei  
741 as defined by DAPI signal. Background subtraction was performed at rolling ball radius of 10  
742 pixels in Fiji with the Rolling Ball Background Subtraction plug-in. Synaptophysin-YFP channel  
743 was used to create 3D binary masks corresponding to EP *Sst+* terminals.

744

745 For co-localization analysis, antibody fluorescence puncta were fit with a gaussian distribution  
746 to identify and assign a pixel location corresponding to the centroid of the gaussian. The YFP  
747 mask was overlaid to the antibody puncta location distributions and co-localization was

748 calculated as the number of pixels that overlapped within the YFP mask divided by the total  
749 number of pixels of the YFP mask. To estimate colocalization level by chance, the locations of  
750 each centroid were randomized prior to co-localization calculation. This randomization was  
751 repeated 1000 times to used calculate a Z-score per sample per antibody signal to pool across  
752 samples (Supplemental Figure 1).

753

754 For cross-correlation analysis, each antibody stack was z-scored and two stacks from the same  
755 sample were compared by shifted one image up to  $\pm 10$  pixels in increments of 1 pixel vertically  
756 and horizontally. At each shift, the co-variance of the images were calculated (Figure 1F). Co-  
757 variance was also measured specifically within the YFP mask by restricting the above calculation  
758 to the image area within the YFP mask (0.1~0.6% of the total image) (Figure 1G).

759

#### 760 **DMOS optical setup**

761 A digital micromirror device (DMD) surface was exposed from a DLP LightCrafter Evaluation  
762 Module (Texas Instruments) and mounted in the optical path to direct the reflected laser beam  
763 to the back aperture of a 0.8 NA 40x objective lens (Olympus). A 473nm collimated beam of  
764 width  $\sim 1$ mm was emitted from the laser (gem 473, Laser Quantum) and was uncollimated by  
765 passing through a static holographic diffuser (Edmund Optics) with  $10^\circ$  divergence angle. A  
766 mechanical shutter (Uniblitz, model LS6Z2) was mounted between the laser and the diffuser to  
767 control the timing of light exposure. The uncollimated, divergent light after the diffuser was  
768 converged using a lens ( $f = 30$  mm) to cover the DMD surface. The diffracted beam from the  
769 DMD was collected by a second lens ( $f = 100$  mm) and relayed to the back-aperture of the  
770 objective to form a conjugate DMD image in the sample plane. The optical setup achieved 22x  
771 magnification of the DMD image onto the sample plane with a resultant field of view of  $299\mu\text{m}$   
772 (width) x  $168\mu\text{m}$  (height).

773

774 Custom software written for ScanImage in MATLAB was used to control the individual DMD  
775 mirrors. Light power was controlled using Laser Quantum RemoteApp software via the RS232  
776 port. The power efficiency of the system was  $\sim 5\%$  from laser output to specimen, resulting in

777 maximum power of 10 mW at the sample plane when all mirrors were in the “on” position. The  
778 validation of the DMD alignment using electrophysiological recording was performed as shown  
779 in Supplemental Figure 3.

780

### 781 **Acute brain slice preparation**

782 Acute brain slices were obtained from adult mice anesthetized by isoflurane inhalation and  
783 perfused transcardially with ice-cold, carbogen-saturated artificial cerebral spinal fluid (aCSF)  
784 containing (in mM): 125 NaCl, 2.5 KCl, 25 NaHCO<sub>3</sub>, 1.25 NaH<sub>2</sub>PO<sub>4</sub>, 2 CaCl<sub>2</sub>, 1 MgCl<sub>2</sub>, and 17  
785 glucose (300 mOsm/kg). The brain was dissected, blocked, and transferred into a tissue slicing  
786 chamber containing ice-cold aCSF. 250-300 μm thick coronal slices containing Lhb were cut  
787 using a Leica VT1000s or VT1200 vibratome. Following cutting, each slice was recovered for 9-  
788 11 min individually in a pre-warmed (34°C) choline-based solution containing (in mM): 110  
789 choline chloride, 11.6 ascorbic acid, 3.1 pyruvic acid, 2.5 KCl, 25 NaHCO<sub>3</sub>, 1.25 NaH<sub>2</sub>PO<sub>4</sub>, 0.5  
790 CaCl<sub>2</sub>, 7 MgCl<sub>2</sub>, and 25 glucose, then for at least 20 min in a secondary recovery chamber filled  
791 with 34°C aCSF. After recovery, the slices in aCSF were cooled down to and maintained at room  
792 temperature until use. Choline and aCSF solutions were under constant carbogenation (95%  
793 O<sub>2</sub>/5% CO<sub>2</sub>).

794

### 795 **Electrophysiology**

796 For whole-cell recordings, individual slices were transferred to a recording chamber mounted  
797 on an upright customized microscope with the DMOS system. Lhb neurons were visualized  
798 using an infrared differential interference contrast method under a 40x water-immersion  
799 Olympus objective. Epifluorescence (LED light source from X-Cite 120Q, Excelitas) was used to  
800 confirm virus expression and to identify regions displaying high density of *Sst+* *tdTom+* axons  
801 within the Lhb. Recording pipettes (2-3MΩ) were pulled from borosilicate glass using P-97  
802 flaming micropipette puller (Sutter). Pipettes were filled with cesium-based internal recordings  
803 solution consisting of (in mM): 135 CsMeSO<sub>3</sub>, 10 HEPES, 1 EGTA, 4 Mg-ATP, 0.3 Na-GTP, 8 Na<sub>2</sub>-  
804 Phosphocreatine, 3.3 QX-314 (Cl<sup>-</sup> salt), pH adjusted to 7.3 with CsOH, and diluted to 290-295  
805 mOsm/kg. Whole-cell voltage clamp recording was performed in acute slices continuously

806 perfused with carbogenated aCSF at room temperature at a flow rate of 3~4ml/min. After  
807 forming an intracellular seal with a target LHb neuron, 473nm light stimulus was delivered using  
808 the full field-of-view of the DMOS setup to activate oChIEF expressing *Sst+* presynaptic axons to  
809 confirm a synaptic transmission onto the postsynaptic cell. In LHb neurons that elicited PSCs,  
810 we subsequently delivered stimulation pulses (2~5ms pulse duration, 100ms interstimulus  
811 interval) consisting of 96 patterns of 23x28  $\mu\text{m}$  boxes that tiled the entirety of the DMOS field-  
812 of-view to identify regions that gave rise to PSCs due to groups of axons. Voltage-clamp  
813 recordings were amplified and low-pass filtered at 3 kHz using a Multiclamp700 B (Axon  
814 Instruments, Molecular Devices) and digitized at 10 kHz using an acquisition board (National  
815 Instrument). Data was saved with a custom version of ScanImage written in MATLAB with the  
816 DMOS package that enabled mapping of the electrophysiological recording that contain PSC  
817 elicited by photo-stimulation to a spatial coordinate on the sample plane. Using this mapping  
818 table, we were able to reconstruct a spatial heatmap indicating the location coordinate of pre-  
819 synaptic axons that synapsed onto the postsynaptic neuron that we recorded from. All  
820 recordings were performed with R,S-3-(2-carboxypiperazin-4-yl) propyl-1-phosphonic acid  
821 (CPP, 10 $\mu\text{M}$  Tocris) in bath solution to block NMDAR-mediated excitatory postsynaptic current.

822  
823 For the compound PSC recording experiment described in Figure 3, LHb neurons were voltage-  
824 clamped at a holding potential of -70 mV while the DMOS system delivered a light stimulation  
825 pattern consisting of a spatiotemporal sequence of 96 different spots for five consecutive  
826 sweeps. The cell was subsequently depolarized to a holding potential of 0mV and delivered the  
827 same stimulation pattern for another five consecutive sweeps.

828  
829 For the minimal stimulation PSC recording experiment described in Figure 4, LHb neurons were  
830 voltage-clamped at an intermediate holding potential of -35 mV or -27mV while the DMOS  
831 setup delivered light stimulation pattern of 96 different spots in each trial. To ensure that we  
832 are only targeting pre-synaptic boutons, tetrodotoxin (TTX, 1 $\mu\text{M}$  Tocris) and 4-Aminopyridine  
833 (4-AP, 400 $\mu\text{M}$  Tocris) were present in the bath solution at room temperature throughout the  
834 experiment. Initial five trials collected using high laser intensity were used to determine the

835 spatial map of input-output responses in the recorded cell. Next, custom software written in  
836 MATLAB was used to select a few hotspots out of the 96 candidate spots to enable rapid  
837 collection of hundreds of trials of data in these hotspots. In some occasions, these spots were  
838 then subdivided into smaller regions and the final hotspots widths ranged from 10~30  $\mu\text{m}$ ,  
839 depending on our ability to evoke a PSC after reducing the stimulation spot size. After finalizing  
840 a stimulation pattern, we then manually adjusted the laser intensity using the Laser Quantum  
841 RemoteApp software until some of these spots elicited PSCs stochastically upon repetitive  
842 stimulation.

843

844 For the serotonin perturbation experiment with DMD ring illumination (Figure 7A-B), LHb  
845 neuron voltage-clamp recordings were performed at holding potentials of -64mV and 10mV, in  
846 presence of CB<sub>1</sub> receptor antagonist AM251 (1 $\mu\text{M}$ , Tocris) at physiological bath temperature.  
847 1 $\mu\text{M}$  Serotonin hydrochloride (Tocris) was applied to perfusion chamber to compare the effect  
848 of serotonin on glutamate/GABA co-release at a macroscopic level. For the serotonin  
849 perturbation experiment with pre-synaptic terminal stimulation (Figure 7C-L), same  
850 experimental condition as in Figure 4 was used with 0.25 $\mu\text{M}$  serotonin hydrochloride (Tocris) to  
851 reduce synaptic release probability.

852

### 853 **Model simulations**

854 We developed a biophysical model simulating a probabilistic neurotransmitter release with  
855 small variance in the vesicle content. To simulate excitatory and inhibitory postsynaptic  
856 currents due to a single vesicle release, we used the *alpha function* of the form:

$$857 \quad I(t) = u(t) \frac{I_{max}}{\tau} (te^{1-\frac{t}{\tau}})$$

858 where  $\tau$  is the time constant determining on- and off-kinetics of the function ( $\tau_E=1\text{ms}$  and  
859  $\tau_I=3\text{ms}$  were used for excitatory and inhibitory PSCs, respectively),  $I_{max}$  is the maximum  
860 amplitude of the current change, and  $u(t)$  is the impulse function that represents the onset of  
861 vesicle release. In the co-packaging version of the model, the excitatory and inhibitory PSCs  
862 occurred together and the vesicle noise was shared. In the independent version, the two PSCs

863 occurred independently from each other with independent vesicle noise. The currents  
864 mediated by two different neurotransmitters were summed to generate net currents of two  
865 versions of release model:

$$866 \quad I_{co-packaging}(t) = a_i I_E(t) + a_i I_I(t) + \xi(t)$$

$$867 \quad I_{independent}(t) = a_i I_E(t) + b_i I_I(t) + \xi(t)$$

868 where  $\xi(t)$  is the white noise with standard deviation  $\sigma = 0.05$ , which scales with the signal  
869 size.  $a_i$  and  $b_i$  represent the scaling factor of the single vesicle content of the  $i^{\text{th}}$  trial

$$870 \quad a_i \sim N(1, \sigma_{vesicle})$$

$$871 \quad b_i \sim N(1, \sigma_{vesicle})$$

872 where  $\sigma_{vesicle}$  is the standard deviation of fluctuations in the vesicle content across trials. We  
873 simulated hundreds of trials to generate a distribution of net currents using the same  
874 parameters for the two versions of model in MATLAB (available from  
875 [https://github.com/seulah-kim/coreleaseAnalysis\\_Kim2021](https://github.com/seulah-kim/coreleaseAnalysis_Kim2021)).

876

## 877 **Analysis of electrophysiology data**

878 All analysis steps were performed in MATLAB (available from [https://github.com/seulah-](https://github.com/seulah-kim/coreleaseAnalysis_Kim2021)  
879 [kim/coreleaseAnalysis\\_Kim2021](https://github.com/seulah-kim/coreleaseAnalysis_Kim2021)). Schematic of analysis pipeline is shown in Supplemental  
880 Figure 4A.

881

882 *Quality check.* To ensure that we only include data collected with stable recording and that  
883 observed changes in evoked current peak size across trials are not due to variable amount of  
884 filtering due to fluctuations in resistance, access resistance between the pipette and the target  
885 cell was computed for every trial by fitting an RC response curve with two exponential functions  
886 and extrapolating the instantaneous peak size. The estimated access resistances across trials  
887 were median filtered, using window size of 2ms, to identify trials that exceeded 25%  
888 percentage of the initial access resistance, which was estimated from a median value of the first  
889 third trials of the total data recorded. In addition, we eliminated trials with >30pA drift in  
890 voltage-clamp recording within the trial. Across trials, any outliers that exceeded 30pA from  
891 the median of average trial value were eliminated.

892

893 *Pre-processing.* Raw current signals were baseline subtracted using the mean of baseline period  
894 (299.9 ms) of each trial. The offset signal was then low-pass filtered at 2kHz and smoothed  
895 using a savitsky-golay filter with polynomial order of 5 and frame length of 2.7 ms, followed by  
896 a moving median filter of 0.6 ms window. The current traces of all trials were grouped based on  
897 the stimulation location and then aligned with respect to the light onset of individual spots.  
898 Each trial was subsequently baseline offset based on the average current of the stimulation  
899 period.

900

901 *Identification of putative hotspots and changepoint analysis.* Median absolute deviation of  
902 individual time point was calculated across trials, for individual spots. If a spot contained time  
903 points that exceeded the 3 scaled median absolute deviation away from the median value for  
904 longer than five consecutive milliseconds, it was sorted as a hotspot. The rest of spots that did  
905 not meet these criteria were sorted as null spots. To determine the time window for trial-by-  
906 trial statistical analysis, change point analysis was performed on the light onset aligned traces  
907 of hotspots. This method identified an onset and an offset of evoked response time window  
908 such that the sum of the residual error of the three partitioned regions is minimized in the local  
909 root mean square level.

910

911 *Fitting a noise model for individual cells.* Null spots and 30ms period prior to photo-stimulation  
912 onset data were pooled to fit a gaussian distribution noise model for individual cells and extract  
913 standard deviation of the symmetric noise centered around the baseline current recording of  
914 each cell.

915

916 *Maximum/minimum amplitude extraction and trial classification.* In order to extract maximum  
917 and minimum amplitudes described in Figure 5, hotspots traces (time x trials) were further  
918 divided into pre-stim (-30ms to 0ms, relative to light-onset) and evoked periods. Maximum and  
919 minimum peak locations were identified trial-by-trial per hotspot for individual periods.  
920 Amplitudes of maximum and minimum peaks during evoked period were estimated by



921 computing 1 ms average around the initial peak locations and subtracting the average value of  
922 the time window spanning -13ms to -3ms, prior to the individual peaks as baselines. Same steps  
923 were repeated using the pre-stim period data to create the null distribution of maximum and  
924 minimum amplitudes. Trials with either the maximum or minimum amplitude that was greater  
925 than 2 scaled standard deviation of symmetric noise of a given cell were classified as success.  
926 The rest of the trials were classified as failures.

927

928 *Classification of hotspots and subtypes.* To determine the final list of hotspots, we bootstrapped  
929 maximum and minimum amplitude pairs extracted from the pre-stim periods of individual  
930 hotspots 10,000 times to generate null distributions of probability of excitatory ( $p(E)$ ), inhibitory  
931 ( $p(I)$ ), and both ( $p(E \cap I)$ ) PSCs using the same criteria defined above for classifying trials as  
932 presence or absence of events. This was to account for spontaneous activity rate that would  
933 give rise to success rate observed during pre-stim period, and we wanted to ask whether  
934 observed success rate during the evoked period was statistically significant compared to the  
935 null success rate of pre-stim period.

936 Furthermore, we categorized individual hotspots into EPSC-only, IPSC-only, and both subtypes  
937 described in Figure 4. In EPSC only hotspots, only the  $p(E)$  during evoked period exceeded the  
938 95% confidence interval of the bootstrapped null distribution of  $p(E)$ . In IPSC only hotspots, only  
939 the  $p(I)$  of evoked period exceeded the 95% confidence interval of the bootstrapped null  
940 distribution of  $p(I)$ . In both hotspots, both  $p(E)$  and  $p(I)$  of evoked period exceeded 95% CI of  
941 the bootstrapped null distributions of  $p(E)$  and  $p(I)$ , respectively.

942

#### 943 **Parametrization of model feature indicator**

944 Model feature indicator derived from probability feature was computed by subtracting the  
945 probability value for which  $\text{cdf}=0.5$  of  $p(E)*p(I)$  distribution (grey) from that of  $p(E \cap I)$   
946 distribution (purple) (Figure 5C,H and Figure 6A). For  $i_{\min}$  feature output, model feature  
947 indicator was calculated as a difference in normalized minimum amplitude,  $i$ , for which  $\text{cdf}=0.5$   
948 between the groups with presence (solid red) and absence (dashed red) of an inhibitory current  
949 (Figure 5D,I). Similar analyses were performed for  $i_{\max}$  feature output for maximum amplitudes

950 between groups with presence (solid blue) and absence (dashed blue) of an excitatory current.  
951 Model feature indicators for correlation<sub>all</sub> and correlation<sub>s</sub> outputs were calculated as  
952 difference in correlation value for which cdf=0.5 between all trials (dark green) and shuffled  
953 (grey) and success only trials (light green) and shuffled (grey) groups, respectively (Figure 5E,J).  
954 For transformation of model feature indicator shown in Figure 6C , probability feature values  
955 less than 0 were assigned to zero and then normalized by 0.25, which is the theoretical  
956 maximum difference if p(E) and p(I) were assumed to be the same. Correlation features  
957 (correlation<sub>all</sub> and correlation<sub>s</sub>) and cdf features ( $i_{\min}$  and  $i_{\max}$ ) values were cut off at 0 (floor) and  
958 1 (ceiling). To reduce dimension after parametrization and transformation, we projected each  
959 spot on the model axis as the average of five model feature indicators (Figure 6D).

960

### 961 **Three types of noise metrics**

962 Symmetric baseline recording noise was computed by fitting a gaussian function (mean and  
963 standard deviation) on pooled data consisting of portion of traces that are null spots  
964 (Supplemental Figure 4A) and 300ms baseline period across trials. Spontaneous activity peaks  
965 were extracted using the same method of minimum and maximum amplitude as described  
966 above applied to 30ms prior to photo-stimulation onset on each trial. Outlier fraction was  
967 calculated as the fraction of datapoints exceeding 3 scaled median absolute deviation from the  
968 pooled data consisting of null spots and 300ms baseline period.

969

### 970 **Analysis of 5-HT pharmacological effect**

971 K-S test was performed with bootstrapping (10,000 times) with resampling size matching the  
972 smaller number of trials of the two groups (normally this is post 5-HT group size) to compare  
973 before and after 5-HT on the minimum and maximum amplitudes.

974

975  $i_{\min}$  and  $i_{\max}$  subset distributions analysis (Figure 7M-N; Supplemental Figure 7D1-6) was  
976 performed by aligning individual trials by the  $i_{\min}$  timepoint within the time window determined  
977 by changepoint analysis. Trials were sorted in ascending order based on the  $i_{\min}$  size and then

978 grouped in 10 trials. Maximum and minimum amplitudes were extracted from the average  
979 trace of each group aligned by  $i_{\min}$  peak location.

980

981 For the prediction of model feature indicator change (Figure 7Q), the trials of pre 5-HT  
982 condition was analyzed with gaussian noise added to match the post 5-HT condition, subset of  
983 success trials were included to match the release probability of post 5-HT condition, and the  $i_{\min}$   
984 and  $i_{\max}$  amplitudes of “both” success trials were scaled to match the scaling of pre vs. post 5-  
985 HT condition of median amplitudes of success trials.

986

### 987 **Statistical tests**

988 Comparisons of proportions of hotspots were done using Fisher’s exact test. Bootstrapping  
989 (10,000 times) method was used to simulate variance in the sampling for statistical tests. Lower  
990 boundary of p-value for bootstrapped results was set by the bootstrap number (e.g.  $p =$   
991  $1/10,000 = 0.0001$ ). Cumulative distributions were compared using Kolmogorov-Smirnov tests.  
992 P-values smaller than 0.001 were reported as  $p < 0.001$ .

### 993 **Tables**

994 Supplemental Table 1. Summary of 5-HT effect on six example co-packaging uPSC sites. Related  
995 to Figure 7. Spot annotated with \* corresponds to Figure7D-M.

996

| spot | Caveats | Sample size of biphasic trials (before/ after) | Proportion of rejecting null (bootstrapped K-S test) “both” success trials | Proportion of rejecting null (bootstrapped K-S test) all success trials | Model axis value change (post-pre) | PSC / noise change (post-pre) |
|------|---------|------------------------------------------------|----------------------------------------------------------------------------|-------------------------------------------------------------------------|------------------------------------|-------------------------------|
| ● *  |         | (52/25)                                        | 0.5196(E);<br>0.3109 (I)                                                   | 0.5992 (E);<br>0.8139 (I)                                               | -0.351                             | -2.024                        |

|   |                                                                                         |          |                           |                           |         |        |
|---|-----------------------------------------------------------------------------------------|----------|---------------------------|---------------------------|---------|--------|
| ● | p(I) drops to 0.18 after 5-HT and the spontaneous activity makes cdf difference smaller | (47/18)  | 0.1632(E);<br>0.1715 (I)  | 0.9933 (E);<br>0.9999 (I) | -0.585  | -3.788 |
| ● | p(E∩I) reduction could be mostly driven by p(I) reduction                               | (41/23)  | 0.2261(E);<br>0.2097 (I)  | 0.5929 (E);<br>0.9989 (I) | -0.341  | -2.846 |
| ● | Putative co-packaging double synapse (smaller cluster and larger cluster)               | (107/49) | 0.9972 (E);<br>0.974 (I)  | 1 (E);<br>1 (I)           | -0.383  | -5.392 |
| ● |                                                                                         | (58/18)  | 0.1523 (E);<br>0.2349 (I) | 0.8604 (E);<br>0.9147 (I) | -0.282  | -1.324 |
| ● | Putative multivesicular release site                                                    | (83/34)  | 0.9969 (E);<br>0.5875 (I) | 0.9988 (E);<br>0.9732 (I) | -0.0224 | -3.488 |

997

## 998 **Acknowledgments**

999 The authors thank Aurélien Bègue, Pavel Gorelik, and Ofer Mazor for help with the DMOS  
1000 setup; Mahmoud El-Rifai and others for production and analysis of array tomography data;  
1001 Adam Granger for assistance with array tomography data analysis; and Sabatini lab members  
1002 for helpful discussions and feedback on the manuscript. This work was supported by NIH  
1003 (R01NS103226 to B.L.S and P30NS072030 to the Neurobiology Imaging Facility). The authors  
1004 declare no competing financial interests.

## 1005 **Author Contributions**

1006 S.K., M.L.W., and B.L.S. designed electrophysiology experiments and discussed results. S.K. and  
1007 B.L.S. built the DMOS system and developed computational models and analysis methods. S.K.  
1008 collected electrophysiology data, performed model simulations, intracranial injections, and  
1009 histology, and analyzed all electrophysiology and array tomography data. M.L.W. and M.E.R.

1010 collected array tomography data. A.R.K. performed intracranial injections and histology. S.K.  
1011 and B.L.S. wrote the manuscript with comments and feedback from the other authors.  
1012

## 1013 **Figure Legends**

### 1014 **Figure 1. Electrophysiological and molecular evidence for glutamate and GABA co-release** 1015 **from EP Sst+ axons in LHb.**

1016 A) *left*, Schematic of the experimental design. *Sst-Cre* mice were bilaterally injected with Cre-  
1017 dependent AAV-DIO-OChIEF-tdTom into the EP (*top*) resulting in axonal labeling of projections  
1018 to the LHb (*bottom*). *right*, Histological analysis showing expression of tdTom in cell bodies at  
1019 the injection site (*top*) and in axons of EP *Sst+* projection neurons in the LHb (*bottom*). Scale  
1020 bars=500  $\mu\text{m}$

1021 B) Example post-synaptic currents (PSCs) recorded from a LHb neuron ( $V_h = -35$  mV) following  
1022 optogenetic activation of EP *Sst+* axons using wide-field minimal photo stimulation in an acute  
1023 brain slice. With repetitive stimulation at minimal power, some trials result in failure of release  
1024 whereas other trials lead to successful release events that evoke both inward and outward  
1025 currents as seen in the biphasic PSCs. The blue box shows the timing and duration of the laser  
1026 pulse.

1027 C) Serial sections of brain tissue containing EP *Sst+* axon terminals labeled with Synaptophysin-  
1028 YFP were sequentially stained with antibodies that label pre- and post-synaptic proteins for  
1029 multiplex fluorescence imaging. Example labeling in a single field of view with antibodies  
1030 against the pre-synaptic marker Synapsin 1 (white), pre-synaptic glutamatergic marker VGLUT2  
1031 (magenta), pre-synaptic GABAergic marker Vgat (yellow), post-synaptic glutamatergic marker  
1032 PSD95 (cyan), and post-synaptic GABAergic marker Gephyrin (red).

1033 D) Enlarged images of the inset in panel C demonstrating colocalization in Synapsin-1-  
1034 expressing YFP-labelled *Sst+* terminals (*left*) of pre-synaptic proteins necessary for release of  
1035 GABA (Vgat) and glutamate (Vglut2) (*top*) and the post-synaptic proteins for scaffolding of  
1036 GABA (Gephyrin) and glutamate (PSD95) ionotropic receptors (*bottom*).

1037 E) Z-scored enrichment of antibody puncta within YFP+ boutons relative to that expected at  
1038 random. Colors indicate data from the same image stack. Dashed lines represent  $\pm 5$  Z-scores.

1039 Total number of YFP labeled terminals=8493, 4 stacks from 3 animals.

1040 F) Average cross-correlations of Z-scored fluorescence intensities for all pairs of antibodies ( $n=4$   
1041 stacks from 3 animals).

1042 G) Average co-variances of Z-scored fluorescence intensities for all pairs of antibodies within  
1043 the YFP-labelled EP *Sst+* terminals.

1044

1045 **Figure 2. Statistical features of synaptic currents predicted by two models of glutamate and**  
1046 **GABA co-release.**

1047 A) *top*, Schematic showing two potential modes of glutamate and GABA co-release from  
1048 individual synaptic terminals in which each class of vesicle is released independently (*left*) or  
1049 the two neurotransmitters are co-packaged in the same vesicle and thus always released  
1050 together (*right*). *bottom*, PSCs predicted by the independent (*left*) and co-packing (*right*)  
1051 models at low synaptic release probability ( $p_r$ ). The independent model predicts that, following  
1052 each stimulation of a single presynaptic bouton and successful vesicle release, the PSC can be  
1053 excitatory, inhibitory, or biphasic. In contrast, the co-packaging model predicts that each PSC  
1054 will be biphasic. In both models, failures of release can also occur.

1055 B) The maximum and minimum PSC amplitudes for the example trials in panel (A) for the  
1056 independent (*left*) and co-packaging (*right*) release models.

1057 C) Scatterplots of the maximum and minimum amplitudes of 200 PSCs generated by simulations  
1058 of independent ( $p_r = 0.5$ , *left*) and co-packaging ( $p_r = 0.75$ , *right*) release models with the same  
1059 rates of synaptic failures (0.25). Amplitudes are normalized to the average maximum (y-axis)  
1060 and minimum (x-axis) amplitudes of success trials. Histograms (in counts) of the normalized  
1061 maximum and minimum release amplitudes with successes of release are shown on the right  
1062 (blue) and top (red) and failures of release in each are shown in grey.

1063 D) *left*, Schematic representations of the areas within the scatterplots used to count events and  
1064 calculate the probabilities of detecting inhibitory ( $p(I)$ ) or excitatory ( $p(E)$ ) currents as well as of  
1065 biphasic currents with both inhibitory and excitatory components ( $p(E \cap I)$ ). Two different trial

1066 types contribute to  $p(E)$  and  $p(I)$ , whereas only one trial type contributes to  $p(E \cap I)$ . *center and*  
1067 *right*, Analysis of the statistical independence of the probabilities of detecting inhibitory ( $p(I)$ )  
1068 and excitatory ( $p(E)$ ) PSCs for the two models was generated by comparing the observed  
1069 probability of excitatory and inhibitory PSCs ( $p(E \cap I)$ , purple) to that expected by chance  
1070 ( $p(E)p(I)$ , gray). Results for independent (*center*) and co-packaging (*right*) release models are  
1071 shown with parameter  $p_r = 0.5$ . The summary of results from 1000 simulations are shown. For  
1072 the independent model (*center*) the histograms overlap, largely obscuring the gray.  
1073 E) *left*, Schematics representations of the areas within the scatterplots used to determine  
1074 presence or absence of excitatory (*top*) or inhibitory (*bottom*) PSC for each trial. *center and*  
1075 *right*, Simulated cumulative distribution functions (cdf) of maximum PSC amplitudes ( $i_{\max}$ , blue)  
1076 given the presence ( $i_{\max}(E)$ , solid) or absence ( $i_{\max}(\text{no } E)$ , dashed) of an excitatory current in the  
1077 independent (*center*) and co-packaging (*right*) release models. Similar analyses were performed  
1078 for the minimum PSC amplitudes ( $-i_{\min}$ , red) given the presence ( $-i_{\min}(I)$ , solid) or absence ( $-$   
1079  $i_{\min}(\text{no } I)$ , dashed) of an inhibitory current. Simulation parameters are the same as those used in  
1080 panel D.  
1081 F) *left*, Schematics of the areas of the scatterplots that contain all (*top*) or success-only (*bottom*)  
1082 trials. *center and right*, Analysis of the trial-by-trial correlation of  $-i_{\min}$  and  $i_{\max}$  of all trials (dark  
1083 green), success-only trials (light green), and after shuffling trial number labels across all trials to  
1084 break the paired relationships between  $-i_{\min}$  and  $i_{\max}$  (grey). Results for the independent  
1085 (*center*) and co-packaging (*right*) release models are shown. Simulation parameters are the  
1086 same as those used in panel D.

1087

1088 **Figure 3. Optical approach to measure PSCs evoked by optogenetic stimulation of groups of**  
1089 **EP Sst+ axons in the LHb.**

1090 A) Schematic of the DMD-based minimal optogenetic stimulation (DMOS) platform. S:  
1091 mechanical shutter; HD: holographic diffuser ( $10^\circ$  diffusing angle); DMD: digital micromirror  
1092 device; L1-2: lens; OBJ: objective lens.

1093 B) Schematic of the workflow showing injection of Cre-dependent AAV encoding the  
1094 optogenetic activator OChIEF into the EP of *Sst-Cre* mice, followed by whole-cell recordings in  
1095 acute-brain slices of LHb under the DMOS system.

1096 C) Optically-evoked average compound (due to high photo stimulation intensity) PSCs in an  
1097 example LHb neuron. EPSCs and IPSCs were acquired while the cell was voltage-clamped at a  
1098 holding potential ( $V_h$ ) of -70 mV (red) or 0 mV (dark blue), respectively. Light blue vertical bars  
1099 show the timing of the laser pulses used for optogenetic stimulation with each pulse delivered  
1100 to a different location in the slice. PSCs are the average of 5 trials. The dotted box encloses  
1101 currents evoked at two stimulation spots that evoke EPSCs of similar size but IPSCs with widely  
1102 differing amplitudes.

1103 D) The number of stimulation spots triggering PSCs (x-axis) in individual cells (*top*, y-axis) or  
1104 across all cells (*bottom*) grouped by the presence of EPSCs only (orange), IPSCs only (blue), or  
1105 both (purple) (n=6 cells/3 animals with 252 total active hotspots).

1106 E) Cumulative distribution functions comparing the EPSC and IPSC amplitude distributions in  
1107 different classes of hotspots. *left*, EPSC-only hotspots have smaller EPSC amplitudes (orange)  
1108 than do co-transmission hotspots (purple). *right*, IPSC-only hotspots have smaller IPSC  
1109 amplitudes (blue) than do co-transmission hotspots (purple). Same dataset as in panel D.

1110 F) Scatterplot of all IPSC vs. EPSC peak amplitude pairs evoked at each photo-stimulated spot in  
1111 an example LHb neuron. The IPSC/EPSC peak amplitude ratio is conserved across multiple sets  
1112 of EP *Sst+* axons synapsing onto the same post-synaptic target cell. The top and right  
1113 histograms show the distributions of EPSC and IPSC amplitudes, respectively. Fitted line:  $y =$   
1114  $0.438 + 0.856x$ .

1115 G) Fitted IPSC/EPSC peak amplitude relationships for data from 6 LHb cells (*left*) and  
1116 corresponding  $R^2$  values (*right*). Colors indicate cell identity matching as in panel D.

1117 H) Optically-evoked average biphasic, compound PSCs recorded at an intermediate holding  
1118 potential,  $V_h = -35$  mV, in the same neuron as in panel C. Blue vertical bars show the timing of  
1119 the laser pulses used for optogenetic stimulation with each pulse delivered to a different  
1120 location under high photo stimulation intensity. PSCs are the average of 5 trials.



1121 I) Scatterplot of maximum and minimum current amplitude pairs in the PSCs recorded at -35  
1122 mV for the example trace shown in panel H. The top and right histograms show the  
1123 distributions of minimum and maximum amplitudes of the PSCs, respectively. Fitted line:  $y =$   
1124  $0.316 + 0.955x$ .

1125

1126 **Figure 4. DMOS evokes unitary responses from EP *Sst+* axons in LHb.**

1127 A) Example spatial heatmaps showing the effects of sequential addition of TTX and 4-AP on  
1128 total charge of EPSCs ( $V_h = -64$  mV) of all stimulation spots using DMOS under high photo-  
1129 stimulation intensity. Total charge of PSC was measured in a 5-25ms time window after the  
1130 onset of photo stimulation. Heatmap represents mean of 5 trials. The recorded cell was located  
1131 approximately at the center of each heatmap.

1132 B) Example spatial heatmaps comparing total charge of EPSCs ( $V_h = -64$  mV) of all stimulation  
1133 spots using DMOS under high (*top*) and minimal (*bottom*) photo-stimulation intensity. Total  
1134 charge of PSC was measured in a 5-25ms time window after the onset of photo stimulation.  
1135 Heatmap represents mean of 5 trials.

1136 C) Examples of spontaneous EPSCs (sEPSCs) (*left*) and unitary evoked biphasic PSC (*middle*) with  
1137 evoked EPSC (eEPSC) amplitude indicated. The PSC was evoked under minimal light stimulation  
1138 in the same cell and holding potential at which the sEPSC was recorded. *right*, Histograms of  
1139 peak amplitudes of sEPSCs (grey, median amplitude 95% CI = 3.37-3.50 pA, median  
1140 frequency=8.9 Hz) pooled across all cells (14 cells, 9 animals) and eEPSCs measured across  
1141 subset of the cells containing unitary evoked biphasic PSCs (orange, median amplitude 95% CI =  
1142 3.82-4.17 pA; 11 cells, 6 animals). Light blue boxes show the timing and duration of the laser  
1143 pulses. Bin width of histogram is 2 pA.

1144 D) As in panel B for a spontaneous IPSC (sIPSC) and unitary evoked IPSC (eIPSC). The sIPSC  
1145 (grey) had median amplitude 95% CI = 9.15-10.51 pA and frequency=0.2 Hz whereas the eIPSCs  
1146 (blue) had median amplitude 95% CI = 3.84-4.18 pA.

1147 E) Average (*top*) and individual (*bottom*) representative unitary PSCs recorded at an  
1148 intermediate  $V_h$  and evoked by repetitive stimulation at three different spots that consistently

1149 evoked PSCs consisting of EPSCs only (red), IPSCs only (blue), or both (purple). Light blue boxes  
1150 show the timing and duration of the laser pulses.

1151 F) The proportions of minimal stimulation spots that triggered PSCs in cells recorded at  $V_h = -27$   
1152 or  $-35$  mV, as indicated (*top*), or across all cells (*bottom*, 14 cells from 9 animals with 44 total  
1153 active minimally-evoked hotspots) grouped by the presence of EPSCs only (orange), IPSCs only  
1154 (blue), or the presence of both EPSCs and IPSCs (purple). Asterisks indicate statistical  
1155 significance of Fisher's exact test comparison of the proportions of each group observed at  $-27$   
1156 mV and  $-35$  mV. Comparisons of the proportions of "both" and "IPSC only" groups across  
1157 potentials reject the null hypothesis of no difference between the observed proportions at two  
1158 holding potentials.

1159

1160 **Figure 5. Unitary responses from glutamate and GABA co-releasing terminals.**

1161 A) Optically-evoked PSCs from an example hotspot consistent with the independent release  
1162 model. *top*, 12 example traces aligned to stimulus onset with blue shaded region indicating the  
1163 duration of light stimulation delivered repeatedly to the same spot. The gray shaded region  
1164 indicates the analysis window in which the maximum (blue dot) and minimum (red dot)  
1165 amplitudes of the PSCs were extracted. *bottom*, Histogram of the times at which maximum  
1166 (blue) and minimum (red) peaks were detected.

1167 B) Scatterplot of the maximum and minimum amplitudes of optically-evoked PSCs of the spot  
1168 shown in panel A. Successes of release (either maximum or minimum amplitude exceeds the  
1169 thresholds indicated by red dotted lines) trials are shown by black filled circles whereas failures  
1170 of release are in gray. Histograms (in counts) of the maximum (*right*, blue) and minimum (*top*,  
1171 red) release amplitudes are shown whereas amplitudes from failures trials are shown in grey.

1172 C) Analysis of the statistical independence of the probabilities of detecting evoked inhibitory  
1173 ( $p(I)$ ) and excitatory ( $p(E)$ ) PSCs for the scatterplot shown in panel B determined by comparison  
1174 of the observed probability of biphasic (excitatory and inhibitory) PSCs ( $p(E \cap I)$ , purple) to the  
1175 probability expected by chance ( $p(E) \cdot p(I)$ , gray). *left*, Histograms of probabilities generated  
1176 from boot strap analysis (10,000 repetitions) of actual data (non-shuffled, *top*) and shuffled  
1177 data in which the pair-wise correspondence between maximum and minimum amplitude was

1178 lost (shuffled, *bottom*). The non-shuffled and shuffled datasets yield the same results,  
1179 consistent with independent glutamate and GABA release at this site. *right*, Simulated  
1180 histograms (500 repeats) of  $p(E)*p(I)$  and  $p(E \cap I)$  generated by independent (*top*) and co-  
1181 packaging (*bottom*) release models using synaptic parameters extracted from the data shown in  
1182 panel B, showing that the data is most consistent with the independent release model. The  
1183 areas within the scatterplots used to count events and calculate  $p(E)$ ,  $p(I)$  and  $p(E \cap I)$  were set  
1184 as in Fig 1.

1185 D) Cdf of maximum PSC amplitudes ( $i_{max}$ , blue) given the presence ( $i_{max}(E)$ , solid) or absence  
1186 ( $i_{max}(\text{no } E)$ , dashed) of an EPSC for the scatterplot shown in panel B. Similar analyses were  
1187 performed for the evoked minimum PSC amplitudes ( $-i_{min}$ , red) given the presence ( $-i_{min}(I)$ , solid)  
1188 or absence ( $-i_{min}(\text{no } I)$ , dashed) of an IPSC. The areas within the scatterplots used to determine  
1189 presence or absence of excitatory and inhibitory PSC for each trace are the same as in Fig 1.

1190 E) Analysis of the trial-by-trial correlation of  $-i_{min}$  and  $i_{max}$  across all trials (dark green), success-  
1191 only trials (light green), and across all trials after shuffling trial number labels to break the  
1192 natural relationship between  $-i_{min}$  and  $i_{max}$  (grey). Bootstrapped (10,000 repetitions) correlation  
1193 coefficients for actual data (*left*) and correlation coefficient distributions from simulations (500  
1194 repetitions) of independent (*middle*) and co-packaging (*right*) release models are shown. The  
1195 areas of the PSC amplitude scatterplots used to measure  $-i_{min}$  and  $i_{max}$  for all or success only  
1196 trials are the same as in Fig 1. Analysis is of the data shown in (B) and using the same simulation  
1197 parameters as in (C).

1198 F-J) As in panels A-E but for PSCs evoked at a hotspot with properties most consistent with the  
1199 co-packaging model. In this case the IPSC and EPSC amplitudes are positively correlated (G and  
1200 J);  $p(E \cap I)$  is significantly greater than expected by chance (H); and the cdfs of  $-i_{min}$  and  $i_{max}$   
1201 depend on the presence or absence of on IPSC and EPSC, respectively (I).

1202

1203 **Figure 6. Statistical results of all unitary co-releasing terminals support the co-packaging**  
1204 **model.**

1205 A) Schematic illustrating the parametrization of a model feature indicator ( $\Delta\text{cdf}_{0.5}$ ) calculated by  
1206 subtracting the medians of two cumulative distribution functions, one representing the

1207 distribution of  $p(E \cap I)$  (purple) and the other that of  $p(E) * p(I)$  (grey). The difference between the  
1208 x-values of the two distributions where  $\text{cdf}=0.5$  indicates the direction and the strength of the  
1209 relative shift of the feature distribution compared to that of the null.

1210 B) Histograms of the model feature indicators derived for the five statistical feature outputs.  
1211 The data represents distributions of 28 DMD-evoked biphasic PSC spots from 11 cells (“both”  
1212 group from Fig 3D). Bin width is 0.05.

1213 C) Heatmap of transformed model feature indicators from B (y-axis) across unitary spots  
1214 exhibiting both EPSCs and IPSCs (x-axis). Color intensity represents increasing support for the  
1215 co-packaging model.

1216 D) Distribution of average model feature indicators of all unitary co-releasing spots ( $n=28$ )  
1217 based on 5 statistical feature outputs shown in C. Each dot represents an individual spot, with  
1218 color indicating the identity of each cell. Increase model axis indicates greater support for the  
1219 co-packaging model. Data collected from the black outlined spots are shown in detail in panel F.

1220 E) Schematic demonstrating three kinds of noise detected in the recordings. *left*, symmetric  
1221 noise is the fluctuations around the baseline current that is fit by a gaussian function. *center*,  
1222 minimum and maximum spontaneous PSC amplitudes can be detected due to spontaneous  
1223 activity outside of the analysis window (grey shaded area) before the stimulus onset (blue  
1224 shaded area). *right*, fraction of outlier current values ( $3x$  the scaled median absolute deviation  
1225 away from the median of entire dataset) captures the contamination due to the frequency of  
1226 large spontaneous synaptic current activity.

1227 F) Scatterplots of maximum and minimum amplitudes of an example ambiguous (*left*, green dot  
1228 from D) and a co-packaging (*right*, orange dot from D) co-releasing hotspots. Histograms (in  
1229 counts) of the evoked maximum (*right*, blue) and minimum (*top*, red) release amplitudes are  
1230 shown whereas amplitudes from spontaneous activity during pre-stimulus baseline period are  
1231 shown in brown (*right* and *top*). Note that the spontaneous activity histogram counts are scaled  
1232 and shown in brown.

1233 G) Average model feature indicators for individual spots are correlated with parameters  
1234 associated with signal-to-noise ratio, such as the fraction of outlier current values in a recording  
1235 during the baseline period (*left*) and the average of EPSC and IPSC signal-to-noise ratio (SNR)

1236 (*right*). The SNR is calculated by dividing the evoked signal amplitude by twice the standard  
1237 deviation of symmetric noise. Colors indicate cells identities, as in panel D. The Pearson  
1238 correlation coefficient for each relationship is shown at the top of each plot.

1239

1240 **Figure 7. 5-HT reduces probability of release of glutamate and GABA while maintaining their**  
1241 **co-packaging.**

1242 A) Schematic of 5-HT application experiment with DMD ring optogenetic stimulation. A LHb  
1243 neuron was voltage clamped at -64 mV and 10 mV while the EP *Sst+* axons were optogenetically  
1244 stimulated to generate propagating axon potentials, resulting in glutamate and GABA co-  
1245 release.

1246 B) Example EPSC ( $V_h = -64$  mV) and IPSC ( $V_h = 10$  mV) evoked by optogenetic activation of EP *Sst+*  
1247 axons using DMD ring photo-stimulation and recorded in a LHb neuron before (gray dashed)  
1248 and after (black) bath application of 5-HT (1  $\mu$ M). The blue box shows the timing and duration  
1249 of the laser pulse.

1250 C) Schematic of 5-HT application experiment using DMOS to activate individual pre-synaptic  
1251 boutons.

1252 D) Average biphasic PSC recorded from a LHb neuron ( $V_h = -35$  mV, black line) following  
1253 optogenetic activation of an EP *Sst+* bouton using DMOS before (*top*,  $n = 141$  trials) and after  
1254 bath application of 5-HT (250 nM, *bottom*,  $n = 147$  trials). 5-HT proportionally reduced the  
1255 average biphasic response – the average biphasic response before 5-HT application is shown  
1256 scaled and overlaid (grey) on the bottom. The shaded blue box shows the timing and duration  
1257 of the laser pulse at minimal intensity.

1258 E) Optically-evoked PSCs from an example hotspot consistent with the co-packaging model. *top*,  
1259 12 example traces aligned to stimulus onset with blue shaded region indicating the duration of  
1260 light stimulation delivered repeatedly to the same spot. The gray shaded region indicates the  
1261 analysis window in which the maximum (blue dot) and minimum (red dot) amplitudes of the  
1262 PSCs were extracted. *bottom*, Histogram of the times at which maximum (blue) and minimum  
1263 (red) peaks were detected.

1264 F) Scatterplot of the maximum and minimum amplitudes of optically-evoked PSCs for the spot  
1265 shown in panel E. Successes of release (either maximum or minimum amplitude exceeds the  
1266 thresholds indicated by red dotted lines) trials are shown by black filled circles whereas failures  
1267 of release are in gray. Histograms (in counts) of the maximum (*right*, blue) and minimum (*top*,  
1268 red) release amplitudes are shown whereas amplitudes from failures trials are shown in grey.  
1269 The probabilities of detecting an EPSC, IPSC, and both are shown in the inset.

1270 G) *left*, optically-evoked PSCs ( $V_h = -35$  mV) showing successes of both neurotransmitter releases.  
1271 *right*, cumulative distribution function of the maximum (blue) and minimum amplitudes (red) of  
1272 these trials.

1273 H) Analysis of statistical features shown: *left*, statistical independence of the probabilities of  
1274 detecting evoked inhibitory ( $p(I)$ ) and excitatory ( $p(E)$ ) PSCs for the scatterplot shown in panel F  
1275 determined by comparison of the observed probability of biphasic (excitatory and inhibitory)  
1276 PSCs ( $p(E \cap I)$ , purple) to the probability expected by chance ( $p(E) * p(I)$ , gray). *middle*, cdf of  
1277 maximum PSC amplitudes ( $i_{max}$ , blue) given the presence ( $i_{max}(E)$ , solid) or absence ( $i_{max}(\text{no } E)$ ,  
1278 dashed) of an excitatory current and vice versa for the scatterplot shown in panel F. *right*, trial-  
1279 by-trial correlation of  $-i_{min}$  and  $i_{max}$  across all trials (dark green), success-only trials (light green),  
1280 and across all trials after shuffling trial number labels to break the natural relationship between  
1281  $-i_{min}$  and  $i_{max}$  (grey).

1282 I-L) As in panels E-H after 5-HT (250 nM) bath application for the same hotspot.

1283 M) 5-HT effects on subset distributions of maximum and minimum amplitudes for the same site  
1284 shown in E-L, without sorting trials by success and failures. Dots show the amplitudes of the  
1285 average trace for different subsets of the dataset before (grey) and after (black) 5-HT  
1286 application.

1287 N) As in M for showing the distributions predicted by independent (orange) and co-packaging  
1288 (black) model simulation results.

1289 O) The effect of 5-HT on the distribution of average model feature indicators of unitary co-  
1290 releasing spots consistent with co-packaging model ( $n=6$ ) based on 5 statistical feature outputs  
1291 shown in Figure 6C. Colors indicate spot identity. Arrows indicate the direction of the model

1292 feature indicator change due to 5-HT application. Circles indicate before 5-HT whereas  
1293 diamonds indicate after 5-HT bath application condition.  
1294 P) Average ratio between PSC and noise of individual spots versus average model feature  
1295 indicators. Average PSC/noise ratio is calculated by dividing average minimum and maximum  
1296 amplitude of all trials by the standard deviation of the baseline noise of a given cell. Colors and  
1297 markers are as in panel O. Pearson correlation coefficient is shown at the top.  
1298 Q) Comparison of observed model axis change due to 5-HT and that predicted by model  
1299 simulation with updated release probability, changes in noise fluctuations, and changes in the  
1300 evoked amplitude of “both” trials. Colors are as in panel O. Linear regression fit is shown in  
1301 solid grey and the estimate of 95% prediction interval is shown in dashed grey. Pearson  
1302 correlation coefficient is shown at the top.

### 1303 **Supplemental Figure Legends**

#### 1304 **Supplemental Figure 1. Co-localization analysis of antibodies within and outside of YFP-** 1305 **labelled EP Sst+ terminals.**

1306 A) Co-localization analysis schematic. The YFP channel fluorescence was used to create masks  
1307 to identify pixel regions containing labeled *Sst+* terminals. Each antibody channels was analyzed  
1308 independently to extract the locations of the centroids of immunolabeled puncta. Extracted  
1309 centroid locations were compared to the YFP masks in the same sample plane. For each  
1310 immunolabeling channel, the percentage of pixels in the YFP+ masks that contained a punctum  
1311 centroid was calculated and is referred to as the “co-localization” metric.

1312 B) Example synapsin-1 immunopuncta co-localization within the YFP mask and the surrounding  
1313 regions compared to that expected by chance. Antibody locations were randomized 1000 times  
1314 and the 99th percentile upper and lower boundaries are shown. Z-score is calculated as the  
1315 difference between the mean antibody co-localization within the YFP mask and the mean  
1316 randomized co-localization, divided by the standard deviation of the random co-localization.

1317 C) Example co-localization analysis results for Vgat, Gephyrin, Vglut2, and PSD95 antibodies  
1318 from the tissue sample shown in B.

1319

1320

1321 **Supplemental Figure 2. Accurate separation of synaptic failures is not required for the cdf**  
1322 **analysis.**

1323 A) Simulated cdfs of maximum PSC amplitudes ( $i_{\max}$ , blue) given a large ( $i_{\max}(E)$ , solid) or small  
1324 ( $i_{\max}(\text{no } E)$ , dashed) excitatory current in the same trial for the independent (*left*) and co-  
1325 packaging (*right*) release models. Similar analyses were performed for the minimum PSC  
1326 amplitudes ( $-i_{\min}$ , red) given large ( $-i_{\min}(I)$ , solid) or small ( $-i_{\min}(\text{no } I)$ , dashed) inhibitory currents  
1327 in the same trial. Simulation parameters are the same as in Fig 2D. Here we used the median to  
1328 separate currents into large and small.

1329

1330 **Supplemental Figure 3. DMD based photo-stimulation enables spatially-specific activation of**  
1331 **EP *Sst+* OChIEF-expressing terminals.**

1332 A) *left*, Each trial consisted of rapid serial illumination of 23 x 28  $\mu\text{m}$  photo stimulation spots to  
1333 96 different locations tiling the field of view in a pseudorandom spatial pattern such that the  
1334 PSCs evoked from each spot are recorded in  $\sim 10\text{s}$  voltage-clamp trace. Shown here is an  
1335 example recording at  $-70\text{ mV}$ . *right*, The 96 PSCs in each trace are extracted and assigned to  
1336 spatial locations based on the coordinates of the illuminated spots and the stimulus timing.

1337 B) Example showing that the DMD-evoked spatial map is consistent with the physical locations  
1338 of EP *Sst+* terminals. *left*, the input-output relationship was initially mapped ( $V_h = -70\text{mV}$ ) using  
1339 the DMD-based optogenetic stimulation platform then the brain slice was shifted in  $+x$  direction  
1340 relative to the microscope objective lens by 40  $\mu\text{m}$  after which the input-output relationship  
1341 was re-mapped. *right*, 2D cross-correlation of the two spatial maps (before and after the  
1342 objective lens movement) reveals that the two images are offset by 2 pixels, as predicted by the  
1343 pixel spacing. The offset is calculated from the X and Y locations where the cumulative sums of  
1344 correlation coefficient across y and x, respectively, reach the 50% of the total sum. Spatial maps  
1345 are calculated from the average of 5 trials.

1346 C) Summary of quantification of cross-correlation calculated shifts as described in (B) for 7 cells  
1347 from 3 animals. Colors indicate the direction of the slice movement.

1348 D) Saturation of the amplitude of the evoked PSC from the same 23 x 28  $\mu\text{m}$  photo-stimulation  
1349 spot in an example LHb neuron. *left*, electrophysiological recording ( $V_h = -70\text{ mV}$ ) for 5 trials at



1350 each indicated light intensity. Traces correspond to 5-25 ms time window after stimulation  
1351 onset. *right*, Individual (circle) and average (line) EPSC amplitudes as a function of illumination  
1352 intensity.

1353 E) Relationship between distance of the stimulation spots from the LHB cell body (located at the  
1354 center of field of view (FOV)) and the corresponding evoked EPSC (*left*) and IPSC (*right*) peak  
1355 amplitudes (data shown for the same neuron as in Fig 3F).

1356 F) Scatterplot of IPSC vs. EPSC peak amplitude pairs evoked at photo-stimulated spots within 80  
1357  $\mu\text{m}$  perimeter from the center of the field of view from the neuron analyzed in Fig 3F.

1358

#### 1359 **Supplemental Figure 4. Automated analysis of evoked unitary responses.**

1360 A) Hotspot detection and classification analysis pipeline flowchart (see Methods).

1361 B) Effect of median absolute deviation (MAD) threshold on the proportion of putative hotspots  
1362 out of total stimulation spots. The MAD threshold, expressed in multiples of the empirically  
1363 measured MAD for each cell, determines the selection of putative active hotspots which are  
1364 required to have current deviation that exceed the threshold at least 5ms (the branching step in  
1365 panel A). Mean and standard deviation of the proportion of illuminated spots designated as  
1366 hotspots (data from 14 cells are shown). A MAD threshold of 3 was used for Figure 4F.

1367 C) Distribution of putative hotspot numbers across all cells (n=14 cells, 9 animals). MAD  
1368 threshold of 3 was used. The holding potential of individual cells is indicated. PSCs are  
1369 designated as EPSCs only (red), IPSCs only (blue), or both (purple).

1370 D) Effect of MAD threshold on the proportion of final hotspot subtypes. As in Figure 4F for MAD  
1371 threshold of 2 (*left*), 2.5 (*middle*), and 5 (*right*). Color code as in panel (C).

1372

#### 1373 **Supplemental Figure 5. Unitary response correlation is not driven by stimulus fluctuations.**

1374 A) Stimulation intensity fluctuation as detected by a photodiode versus trial-by-trial outcome  
1375 (left) and amplitudes of  $-i_{\text{min}}$  and  $i_{\text{max}}$ . Same dataset as in Figure 5F-J.

1376

#### 1377 **Supplemental Figure 6. Model feature indicators are correlated in their support for the co- 1378 packaging model.**

1379 A) Correlation heatmap of model feature indicators. Color represents the pair-wise correlation  
1380 of each model feature across the same spots in (C).

1381

1382 **Supplemental Figure 7. 5-HT reduces probabilities of detecting EPSCs and IPSCs evoked by EP**  
1383 **Sst+ terminal activation.**

1384 A) Peak amplitude changes in the DMD ring stimulation evoked in the composite EPSC (-64 mV)  
1385 and IPSC (10 mV) as result of 5-HT bath application. Each dot represents the difference in mean  
1386 evoked peak amplitude of 15 trials before and after 5-HT application. Asterisks represent  
1387 significance level of unpaired t-test comparing pre and post 5-HT groups. Colors indicate cell  
1388 identity.

1389 B) Average relative minimum and maximum amplitude changes of DMOS-evoked unitary  
1390 biphasic spots across all trials as result of 5-HT bath application. Colors indicate spot identity  
1391 consistent as in Figure 7O.

1392 C) Changes in probabilities of detecting success trials, EPSC, IPSC, and both trials due to 5-HT  
1393 bath application for DMOS-stimulated unitary biphasic spots. Each dot represents the  
1394 difference in probabilities calculated from scatterplot of each spot before and after 5-HT. Colors  
1395 and markers are consistent as in panel B.

1396 D) The effect of 5-HT on subset distributions of minimum and maximum amplitudes of co-  
1397 packaging sites, without sorting trials by success and failures. Scatter corresponds to the  
1398 amplitudes of the average trace of different subsets of dataset before (blue) and after (red) 5-  
1399 HT bath application. Each dot in the top right indicates spot identity consistent as in Figure 7O.

1400 E) The effect of 5-HT on the average waveform of co-packaging sites, without sorting trials by  
1401 success and failures. Average of each trial was aligned by the minimum peak location within the  
1402 analysis time window. Before (blue) and after (red, normalized by the minimum peak amplitude  
1403 of “before” condition) 5-HT bath application traces are compared. Each dot in the top right  
1404 indicates spot identity as in Figure 7O.

1405

## 1406 References

- 1407 Barker, D.J., Miranda-Barrientos, J., Zhang, S., Root, D.H., Wang, H.-L., Liu, B., Calipari, E.S.,  
1408 Morales, M., 2017. Lateral Preoptic Control of the Lateral Habenula through Convergent  
1409 Glutamate and GABA Transmission. *Cell Rep* 21, 1757–1769.  
1410 <https://doi.org/10.1016/j.celrep.2017.10.066>
- 1411 Cerniauskas, I., Winterer, J., de Jong, J.W., Lukacsovich, D., Yang, H., Khan, F., Peck, J.R.,  
1412 Obayashi, S.K., Lilascharoen, V., Lim, B.K., Földy, C., Lammel, S., 2019. Chronic Stress  
1413 Induces Activity, Synaptic, and Transcriptional Remodeling of the Lateral Habenula  
1414 Associated with Deficits in Motivated Behaviors. *Neuron* 104, 899–915.e8.  
1415 <https://doi.org/10.1016/j.neuron.2019.09.005>
- 1416 Granger, A.J., Wang, W., Robertson, K., El-Rifai, M., Zanello, A.F., Bistrong, K., Saunders, A.,  
1417 Chow, B.W., Nuñez, V., Turrero García, M., Harwell, C.C., Gu, C., Sabatini, B.L., 2020.  
1418 Cortical ChAT+ neurons co-transmit acetylcholine and GABA in a target- and brain-  
1419 region-specific manner. *Elife* 9. <https://doi.org/10.7554/eLife.57749>
- 1420 Hong, S., Hikosaka, O., 2008. The Globus Pallidus Sends Reward-Related Signals to the Lateral  
1421 Habenula. *Neuron* 60, 720–729. <https://doi.org/10.1016/j.neuron.2008.09.035>
- 1422 Hu, H., Cui, Y., Yang, Y., 2020. Circuits and functions of the lateral habenula in health and in  
1423 disease. *Nat Rev Neurosci* 21, 277–295. <https://doi.org/10.1038/s41583-020-0292-4>
- 1424 Hwang, E.-K., Chung, J., 2014. 5HT1B receptor-mediated pre-synaptic depression of excitatory  
1425 inputs to the rat lateral habenula. *Neuropharmacology* 81, 153–165.  
1426 <https://doi.org/10.1016/j.neuropharm.2014.01.046>
- 1427 Jonas, P., Bischofberger, J., Sandkühler, J., 1998. Corelease of Two Fast Neurotransmitters at a  
1428 Central Synapse. *Science* 281, 419–424. <https://doi.org/10.1126/science.281.5375.419>
- 1429 Knowland, D., Lilascharoen, V., Pacia, C.P., Shin, S., Wang, E.H.-J., Lim, B.K., 2017. Distinct  
1430 Ventral Pallidal Neural Populations Mediate Separate Symptoms of Depression. *Cell* 170,  
1431 284–297.e18. <https://doi.org/10.1016/j.cell.2017.06.015>
- 1432 Lammel, S., Lim, B.K., Ran, C., Huang, K.W., Betley, M.J., Tye, K.M., Deisseroth, K., Malenka, R.C.,  
1433 2012. Input-specific control of reward and aversion in the ventral tegmental area.  
1434 *Nature* 491, 212–217. <https://doi.org/10.1038/nature11527>
- 1435 Lazaridis, I., Tzortzi, O., Weglage, M., Märtin, A., Xuan, Y., Parent, M., Johansson, Y., Fuzik, J.,  
1436 Fürth, D., Fenno, L.E., Ramakrishnan, C., Silberberg, G., Deisseroth, K., Carlén, M.,  
1437 Meletis, K., 2019. A hypothalamus-habenula circuit controls aversion. *Molecular*  
1438 *Psychiatry* 24, 1351–1368. <https://doi.org/10.1038/s41380-019-0369-5>
- 1439 Lee, S., Kim, K., Zhou, Z.J., 2010. Role of ACh-GABA cotransmission in detecting image motion  
1440 and motion direction. *Neuron* 68, 1159–1172.  
1441 <https://doi.org/10.1016/j.neuron.2010.11.031>
- 1442 Li, B., Piriz, J., Mirrione, M., Chung, C., Proulx, C.D., Schulz, D., Henn, F., Malinow, R., 2011.  
1443 Synaptic potentiation onto habenula neurons in the learned helplessness model of  
1444 depression. *Nature* 470, 535–539. <https://doi.org/10.1038/nature09742>
- 1445 Li, H., Pullmann, D., Jhou, T.C., 2019. Valence-encoding in the lateral habenula arises from the  
1446 entopeduncular region. *eLife* 8, e41223. <https://doi.org/10.7554/eLife.41223>

- 1447 Lin, J.Y., Lin, M.Z., Steinbach, P., Tsien, R.Y., 2009. Characterization of engineered  
1448 channelrhodopsin variants with improved properties and kinetics. *Biophys J* 96, 1803–  
1449 1814. <https://doi.org/10.1016/j.bpj.2008.11.034>
- 1450 Maroteaux, M., Mameli, M., 2012. Cocaine Evokes Projection-Specific Synaptic Plasticity of  
1451 Lateral Habenula Neurons. *J Neurosci* 32, 12641–12646.  
1452 <https://doi.org/10.1523/JNEUROSCI.2405-12.2012>
- 1453 Matsumoto, M., Hikosaka, O., 2009. Two types of dopamine neuron distinctly convey positive  
1454 and negative motivational signals. *Nature* 459, 837–841.  
1455 <https://doi.org/10.1038/nature08028>
- 1456 Matsumoto, M., Hikosaka, O., 2007. Lateral habenula as a source of negative reward signals in  
1457 dopamine neurons. *Nature* 447, 1111–1115. <https://doi.org/10.1038/nature05860>
- 1458 Meye, F.J., Soiza-Reilly, M., Smit, T., Diana, M.A., Schwarz, M.K., Mameli, M., 2016. Shifted  
1459 pallidal co-release of GABA and glutamate in habenula drives cocaine withdrawal and  
1460 relapse. *Nature Neuroscience* 19, 1019–1024. <https://doi.org/10.1038/nn.4334>
- 1461 Micheva, K.D., Smith, S.J., 2007. Array Tomography: A New Tool for Imaging the Molecular  
1462 Architecture and Ultrastructure of Neural Circuits. *Neuron* 55, 25–36.  
1463 <https://doi.org/10.1016/j.neuron.2007.06.014>
- 1464 Petreanu, L., Huber, D., Sobczyk, A., Svoboda, K., 2007. Channelrhodopsin-2-assisted circuit  
1465 mapping of long-range callosal projections. *Nat Neurosci* 10, 663–668.  
1466 <https://doi.org/10.1038/nn1891>
- 1467 Petreanu, L., Mao, T., Sternson, S.M., Svoboda, K., 2009. The subcellular organization of  
1468 neocortical excitatory connections. *Nature* 457, 1142–1145.  
1469 <https://doi.org/10.1038/nature07709>
- 1470 Proulx, C.D., Hikosaka, O., Malinow, R., 2014. Reward processing by the lateral habenula in  
1471 normal and depressive behaviors. *Nature Neuroscience* 17, 1146–1152.  
1472 <https://doi.org/10.1038/nn.3779>
- 1473 Root, D.H., Mejias-Aponte, C.A., Qi, J., Morales, M., 2014. Role of Glutamatergic Projections  
1474 from Ventral Tegmental Area to Lateral Habenula in Aversive Conditioning. *J Neurosci*  
1475 34, 13906–13910. <https://doi.org/10.1523/JNEUROSCI.2029-14.2014>
- 1476 Root, D.H., Zhang, S., Barker, D.J., Miranda-Barrientos, J., Liu, B., Wang, H.-L., Morales, M.,  
1477 2018. Selective Brain Distribution and Distinctive Synaptic Architecture of Dual  
1478 Glutamatergic-GABAergic Neurons. *Cell Reports* 23, 3465–3479.  
1479 <https://doi.org/10.1016/j.celrep.2018.05.063>
- 1480 Saunders, A., Granger, A.J., Sabatini, B.L., 2015. Corelease of acetylcholine and GABA from  
1481 cholinergic forebrain neurons. *eLife* 4, e06412. <https://doi.org/10.7554/eLife.06412>
- 1482 Shabel, S.J., Proulx, C.D., Piriz, J., Malinow, R., 2014. GABA/glutamate co-release controls  
1483 habenula output and is modified by antidepressant treatment. *Science* 345, 1494–1498.  
1484 <https://doi.org/10.1126/science.1250469>
- 1485 Shabel, S.J., Proulx, C.D., Trias, A., Murphy, R.T., Malinow, R., 2012. Input to the lateral  
1486 habenula from the basal ganglia is excitatory, aversive, and suppressed by serotonin.  
1487 *Neuron* 74, 475–481. <https://doi.org/10.1016/j.neuron.2012.02.037>
- 1488 Stamatakis, A.M., Stuber, G.D., 2012. Activation of lateral habenula inputs to the ventral  
1489 midbrain promotes behavioral avoidance. *Nature Neuroscience* 15, 1105–1107.  
1490 <https://doi.org/10.1038/nn.3145>

- 1491 Stamatakis, A.M., Van Swieten, M., Basiri, M.L., Blair, G.A., Katak, P., Stuber, G.D., 2016.  
1492 Lateral Hypothalamic Area Glutamatergic Neurons and Their Projections to the Lateral  
1493 Habenula Regulate Feeding and Reward. *J Neurosci* 36, 302–311.  
1494 <https://doi.org/10.1523/JNEUROSCI.1202-15.2016>
- 1495 Stephenson-Jones, M., Yu, K., Ahrens, S., Tucciarone, J.M., van Huijstee, A.N., Mejia, L.A., Penzo,  
1496 M.A., Tai, L.-H., Wilbrecht, L., Li, B., 2016. A basal ganglia circuit for evaluating action  
1497 outcomes. *Nature* 539, 289–293. <https://doi.org/10.1038/nature19845>
- 1498 Taniguchi, H., He, M., Wu, P., Kim, S., Paik, R., Sugino, K., Kvitsani, D., Fu, Y., Lu, J., Lin, Y.,  
1499 Miyoshi, G., Shima, Y., Fishell, G., Nelson, S.B., Huang, Z.J., 2011. A Resource of Cre  
1500 Driver Lines for Genetic Targeting of GABAergic Neurons in Cerebral Cortex. *Neuron* 71,  
1501 995–1013. <https://doi.org/10.1016/j.neuron.2011.07.026>
- 1502 Tritsch, N.X., Ding, J.B., Sabatini, B.L., 2012. Dopaminergic neurons inhibit striatal output  
1503 through non-canonical release of GABA. *Nature* 490, 262–266.  
1504 <https://doi.org/10.1038/nature11466>
- 1505 Tritsch, N.X., Granger, A.J., Sabatini, B.L., 2016. Mechanisms and functions of GABA co-release.  
1506 *Nature Reviews Neuroscience* 17, 139–145. <https://doi.org/10.1038/nrn.2015.21>
- 1507 Trusel, M., Nuno-Perez, A., Lecca, S., Harada, H., Lalive, A.L., Congiu, M., Takemoto, K.,  
1508 Takahashi, T., Ferraguti, F., Mameli, M., 2019. Punishment-Predictive Cues Guide  
1509 Avoidance through Potentiation of Hypothalamus-to-Habenula Synapses. *Neuron* 102,  
1510 120-127.e4. <https://doi.org/10.1016/j.neuron.2019.01.025>
- 1511 Wallace, M.L., Saunders, A., Huang, K.W., Philson, A.C., Goldman, M., Macosko, E.Z., McCarroll,  
1512 S.A., Sabatini, B.L., 2017. Genetically Distinct Parallel Pathways in the Entopeduncular  
1513 Nucleus for Limbic and Sensorimotor Output of the Basal Ganglia. *Neuron* 94, 138-  
1514 152.e5. <https://doi.org/10.1016/j.neuron.2017.03.017>
- 1515 Yang, Y., Cui, Y., Sang, K., Dong, Y., Ni, Z., Ma, S., Hu, H., 2018. Ketamine blocks bursting in the  
1516 lateral habenula to rapidly relieve depression. *Nature* 554, 317–322.  
1517 <https://doi.org/10.1038/nature25509>
- 1518 Zhang, S., Qi, J., Li, X., Wang, H.-L., Britt, J.P., Hoffman, A.F., Bonci, A., Lupica, C.R., Morales, M.,  
1519 2015. Dopaminergic and glutamatergic microdomains within a subset of rodent  
1520 mesoaccumbens axons. *Nat Neurosci* 18, 386–392. <https://doi.org/10.1038/nn.3945>  
1521

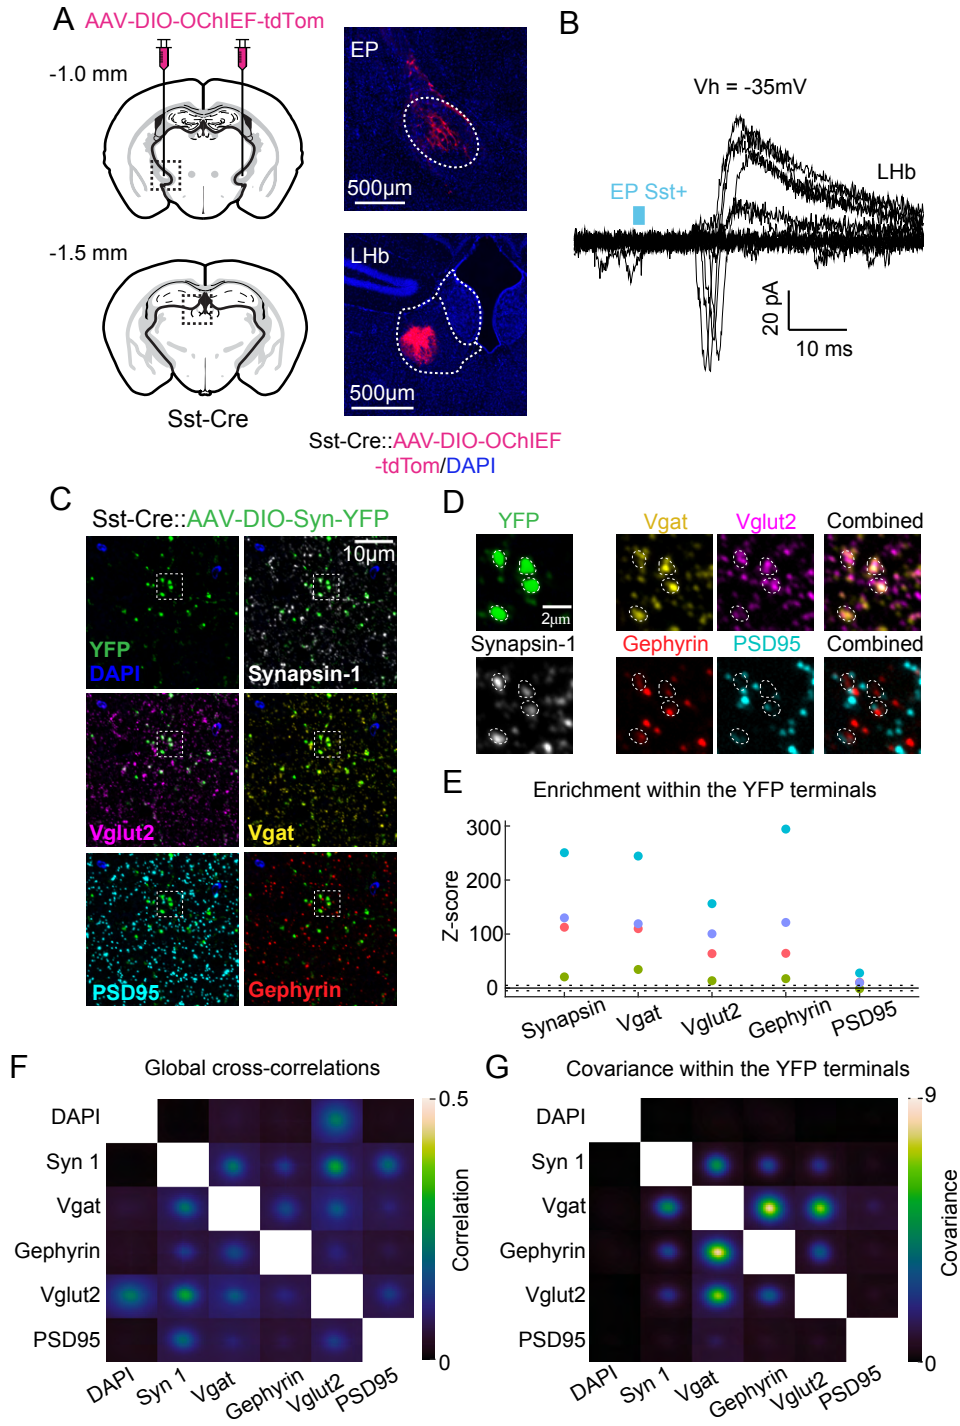

Figure 2.

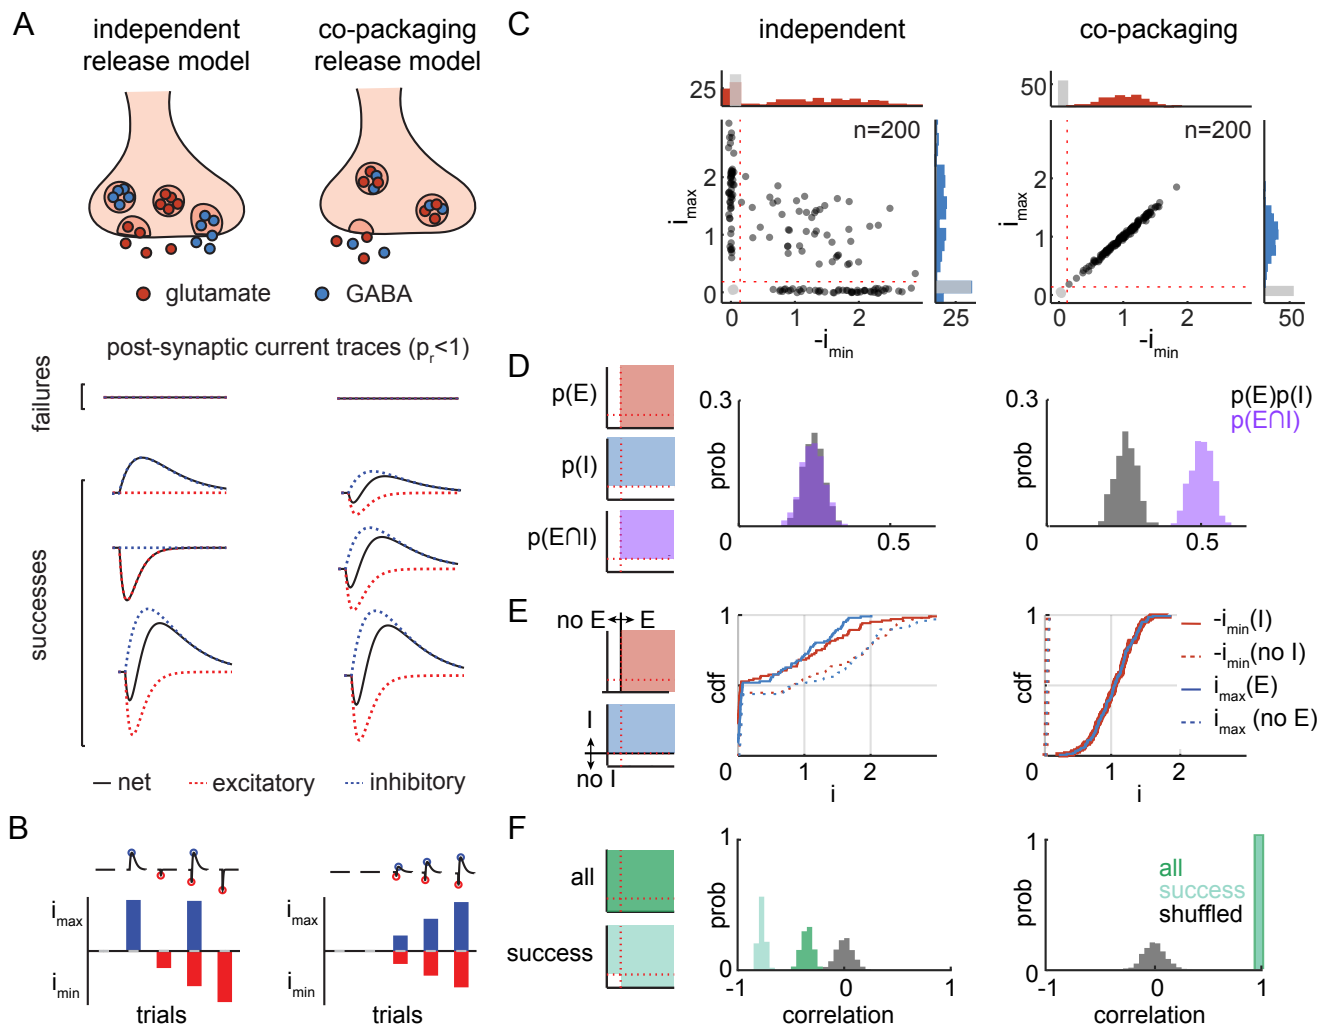



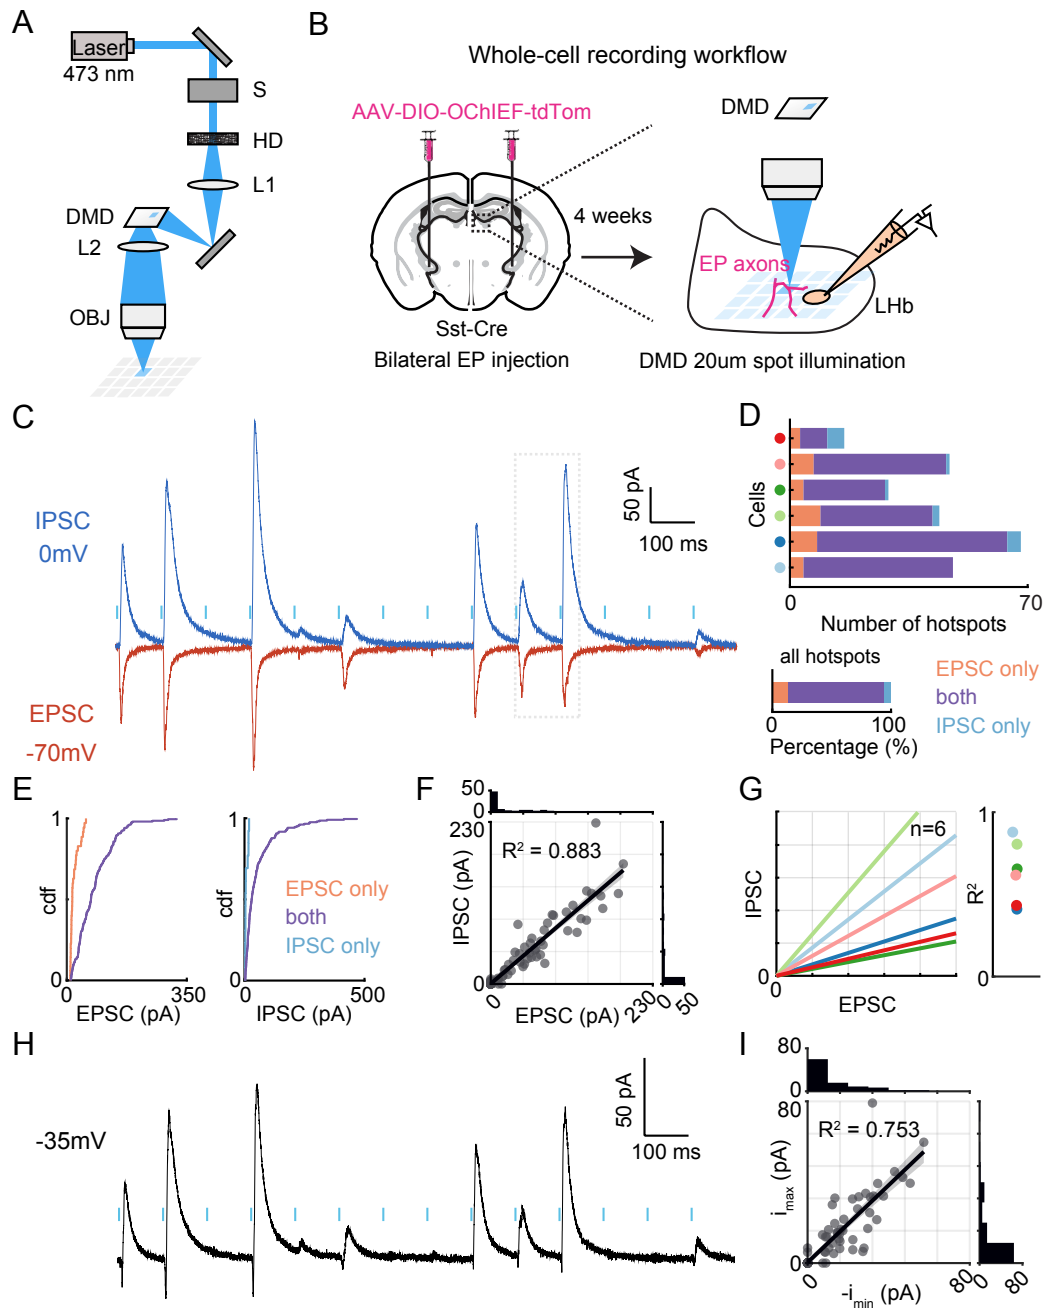



Figure 4.

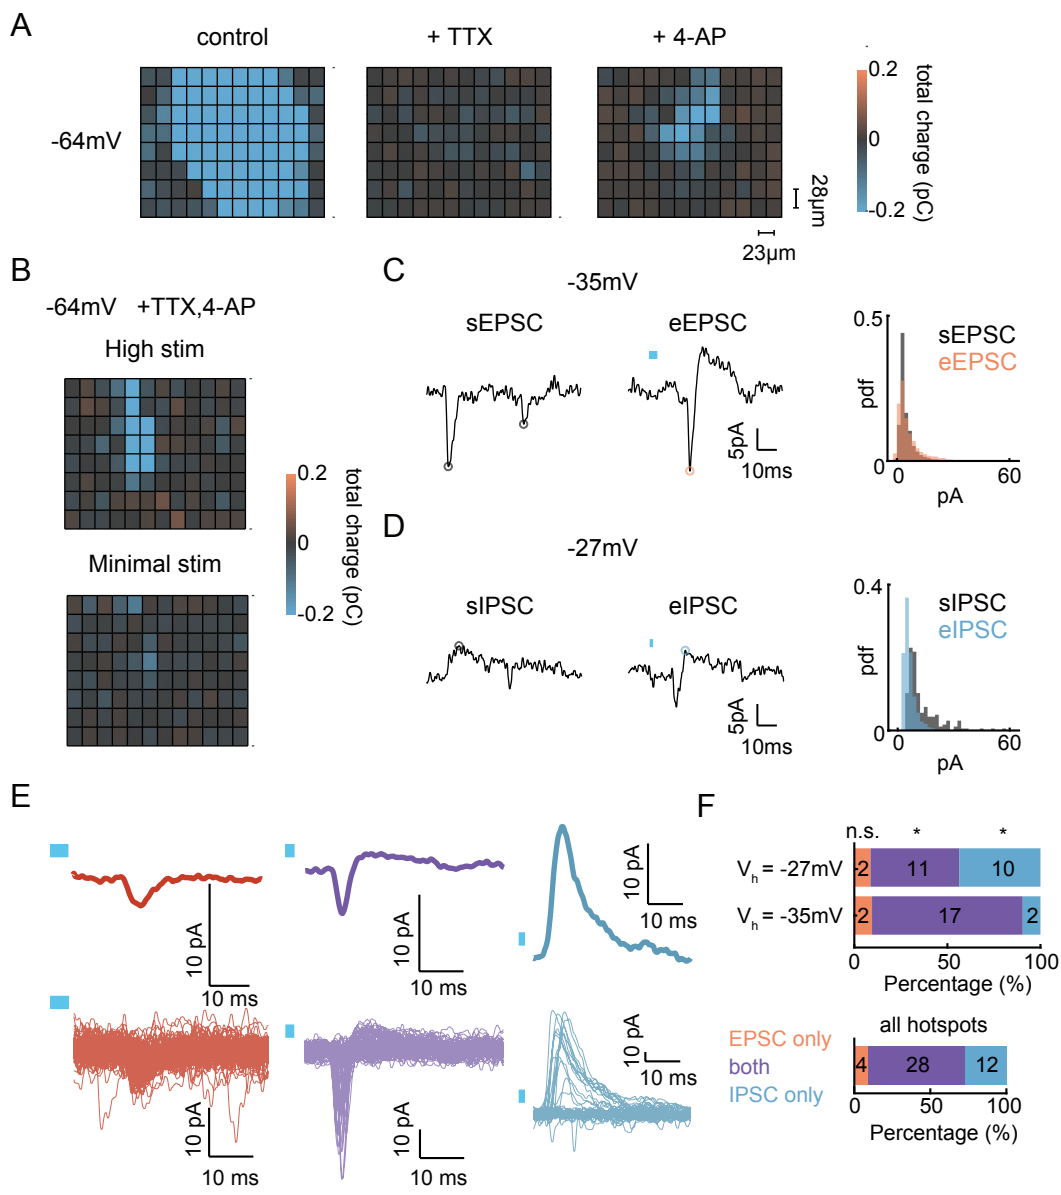

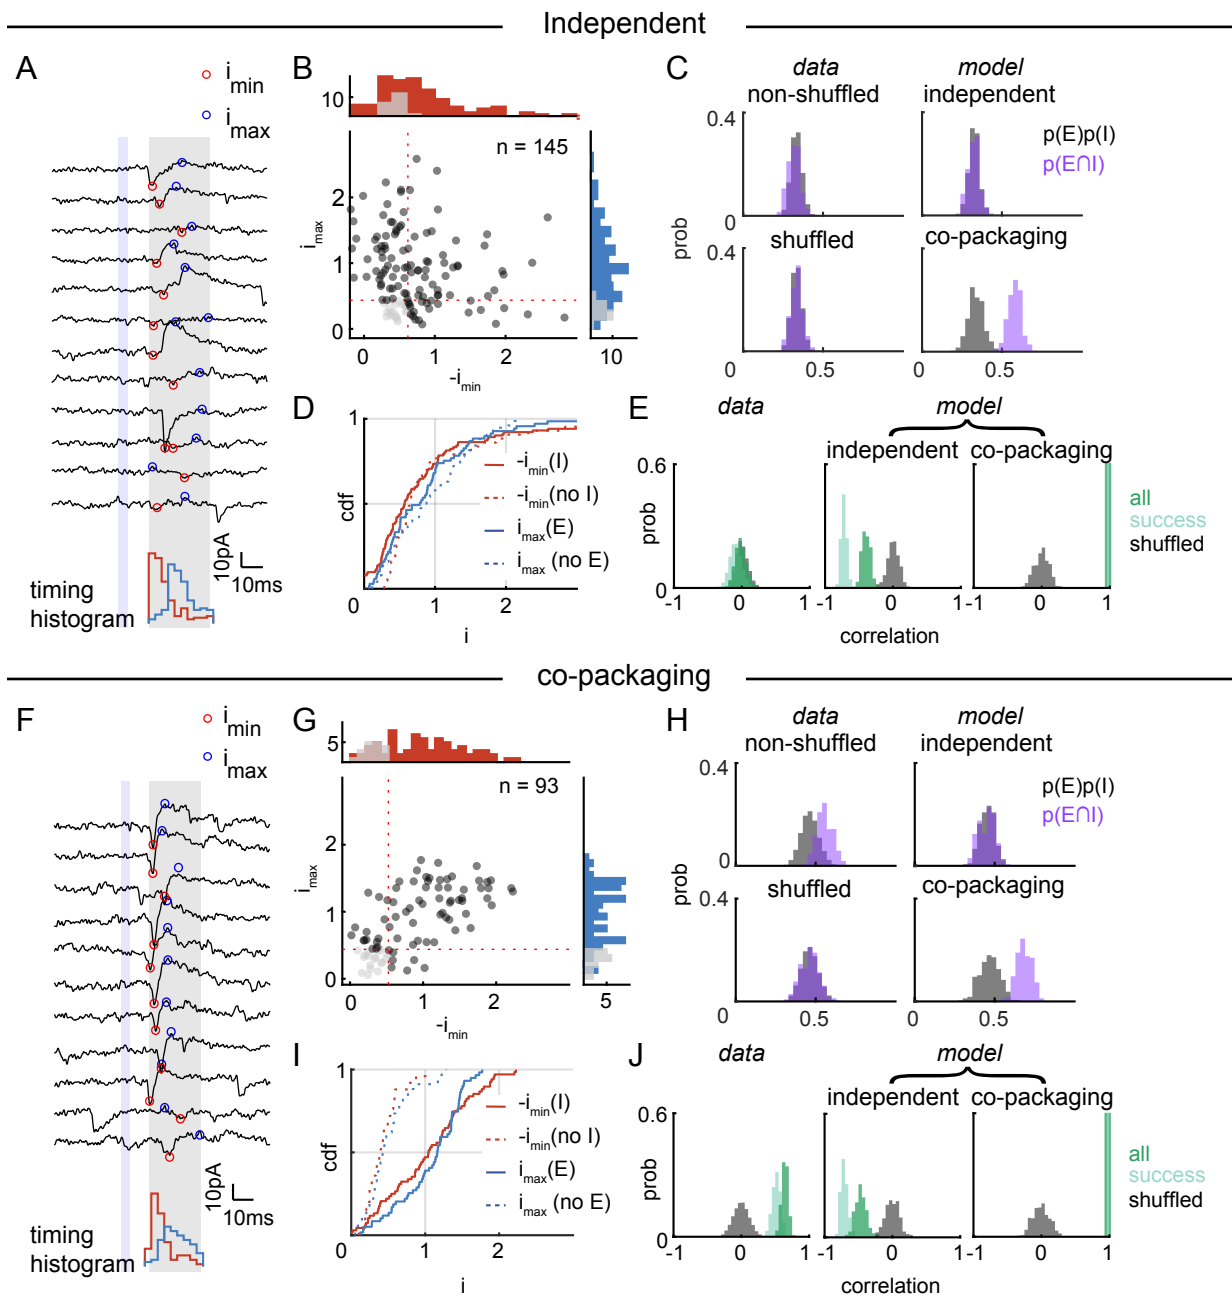

Figure 6.

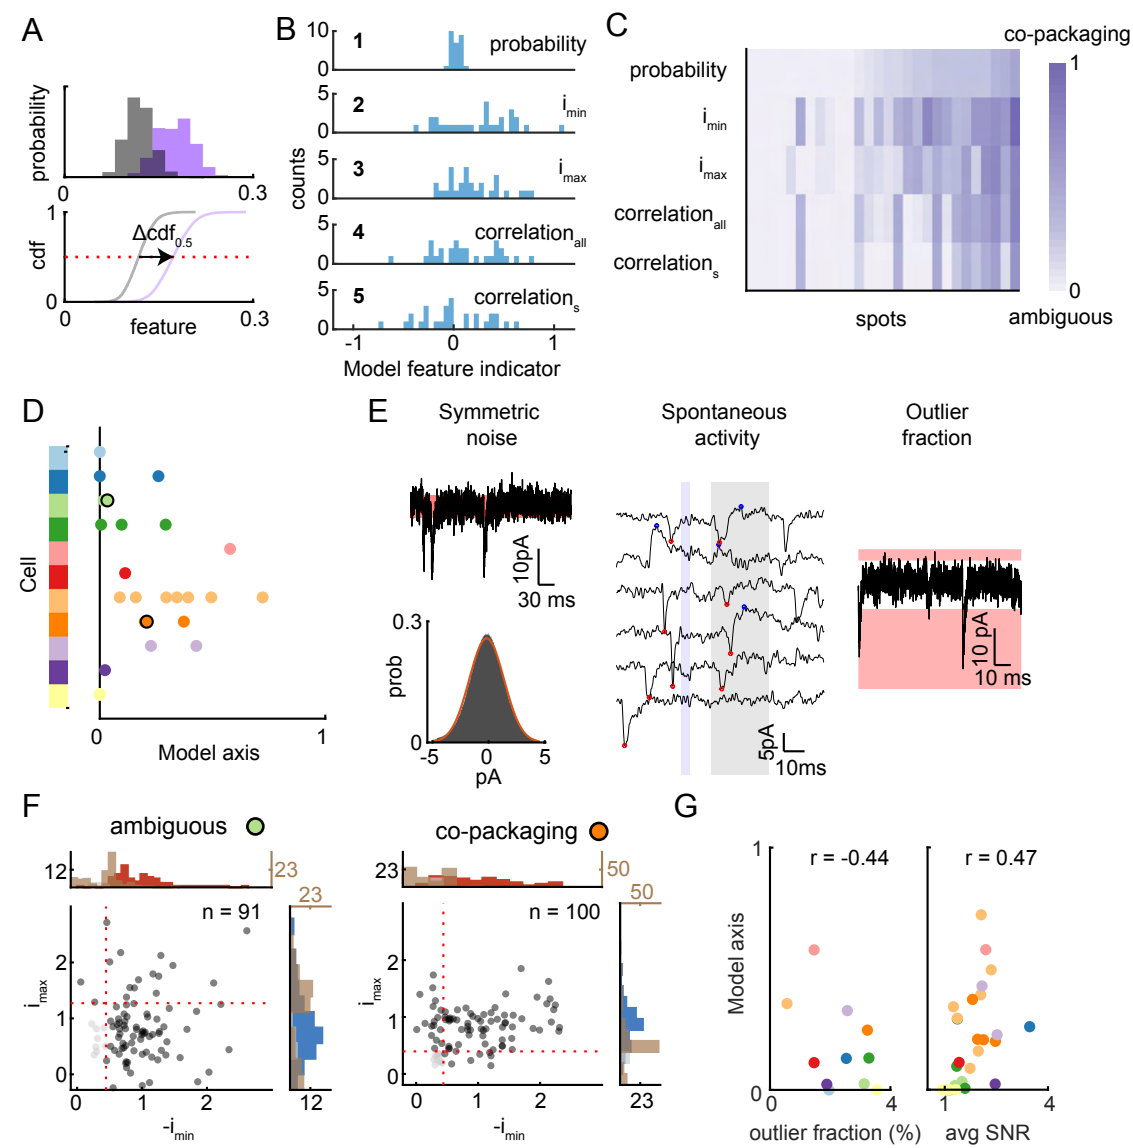

Figure 7.

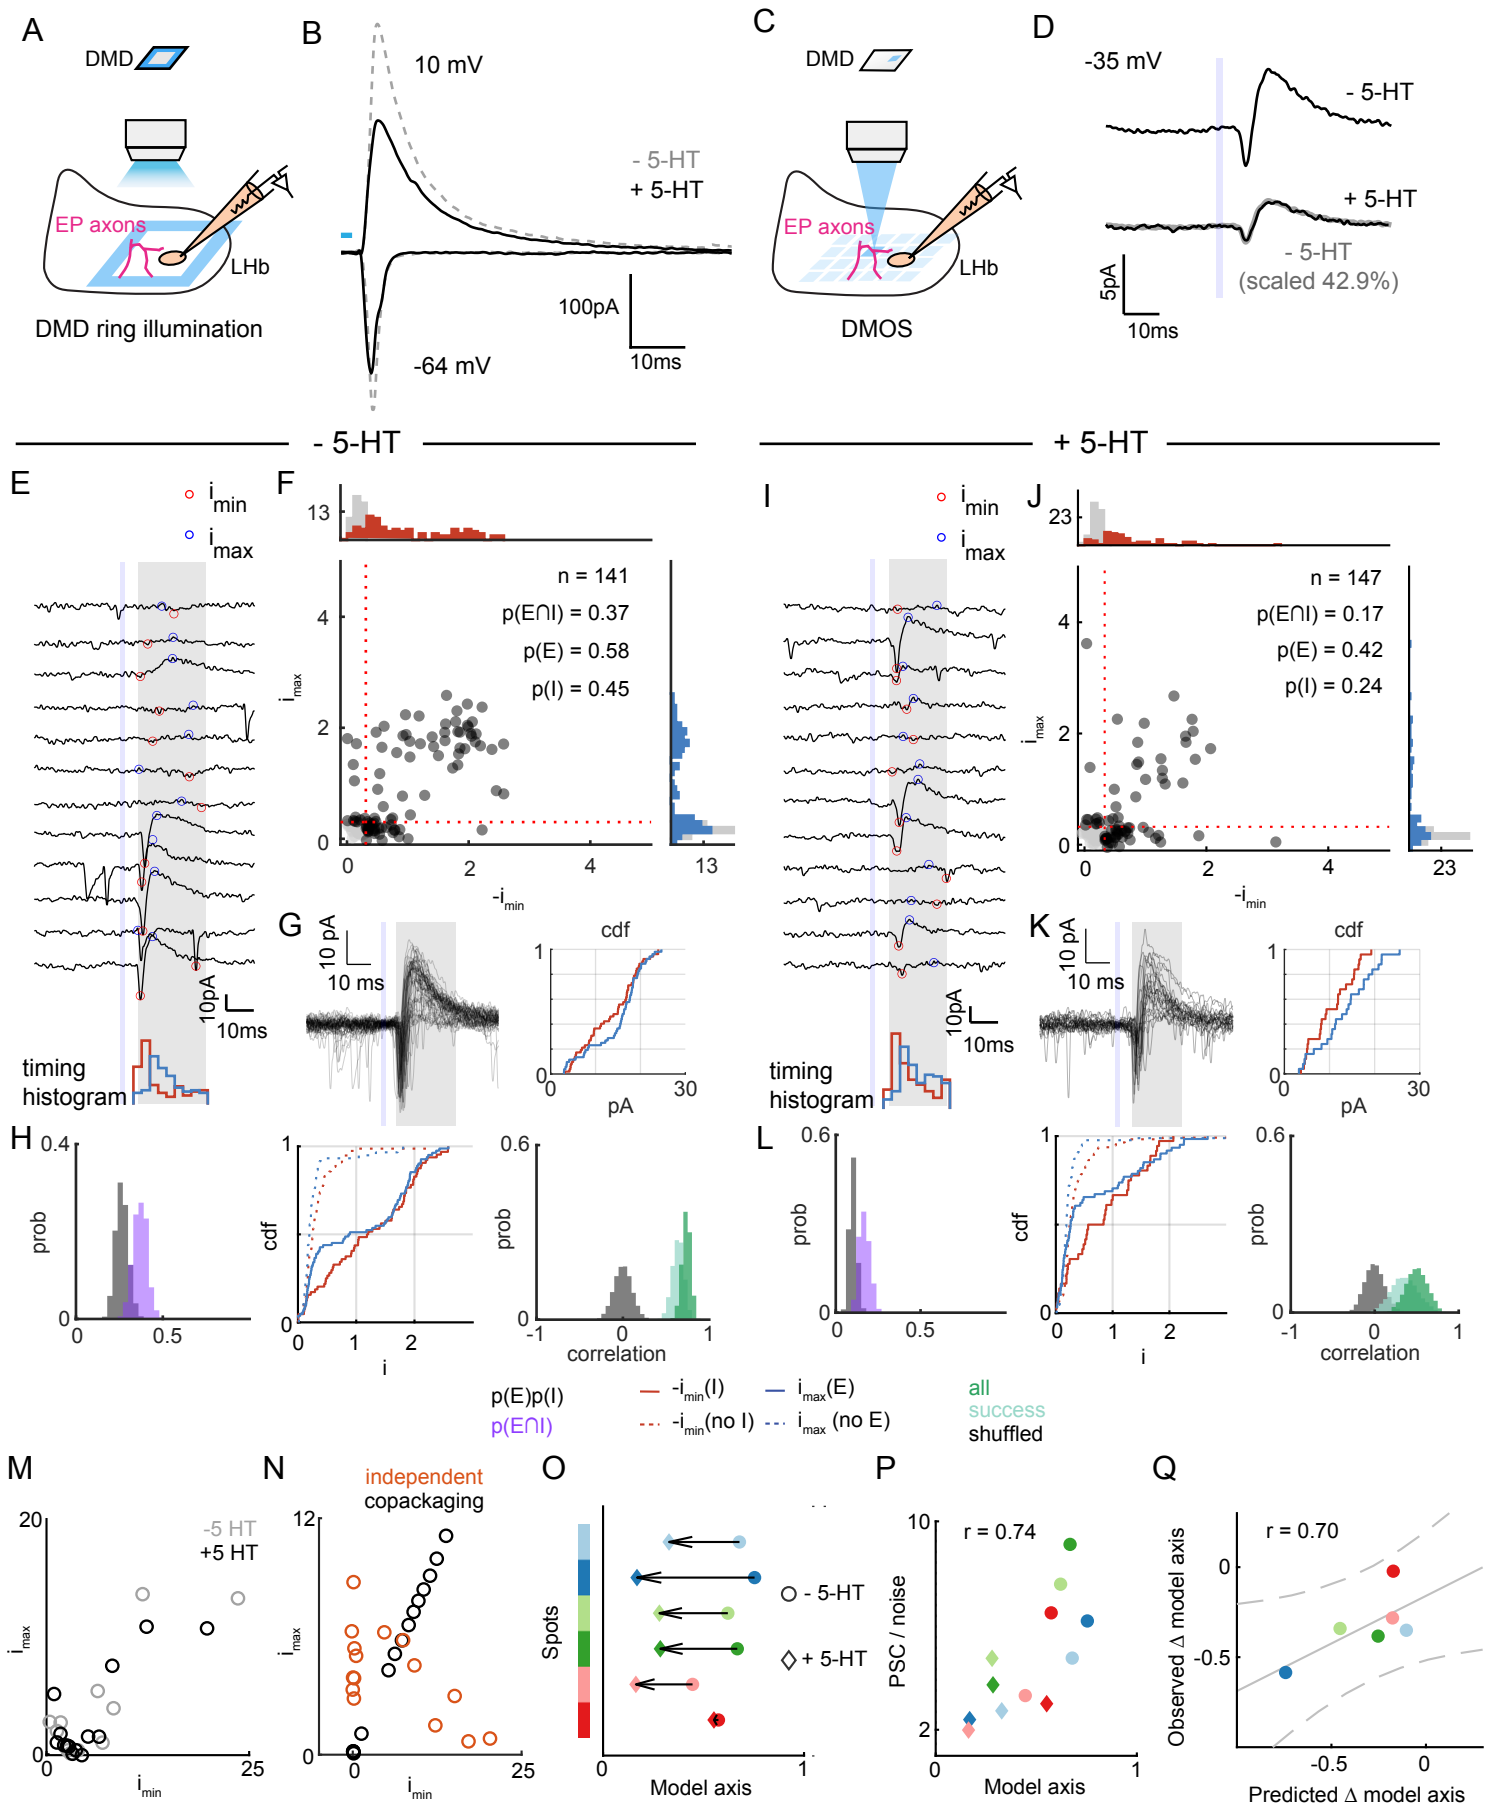

A

1. Create YFP Mask

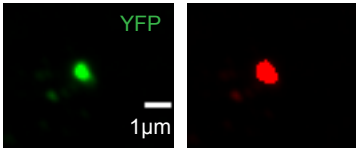

2. Antibody centroid detection

3. Overlay YFP mask and immunopuncta

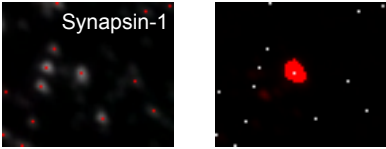

B

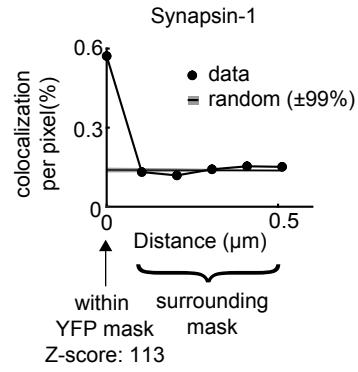

C

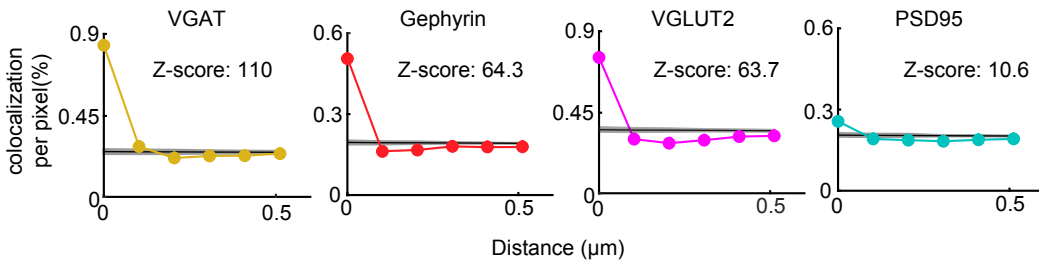

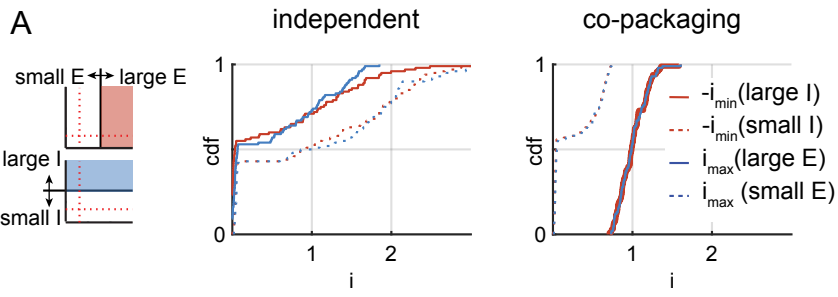

# Supplemental Figure 6

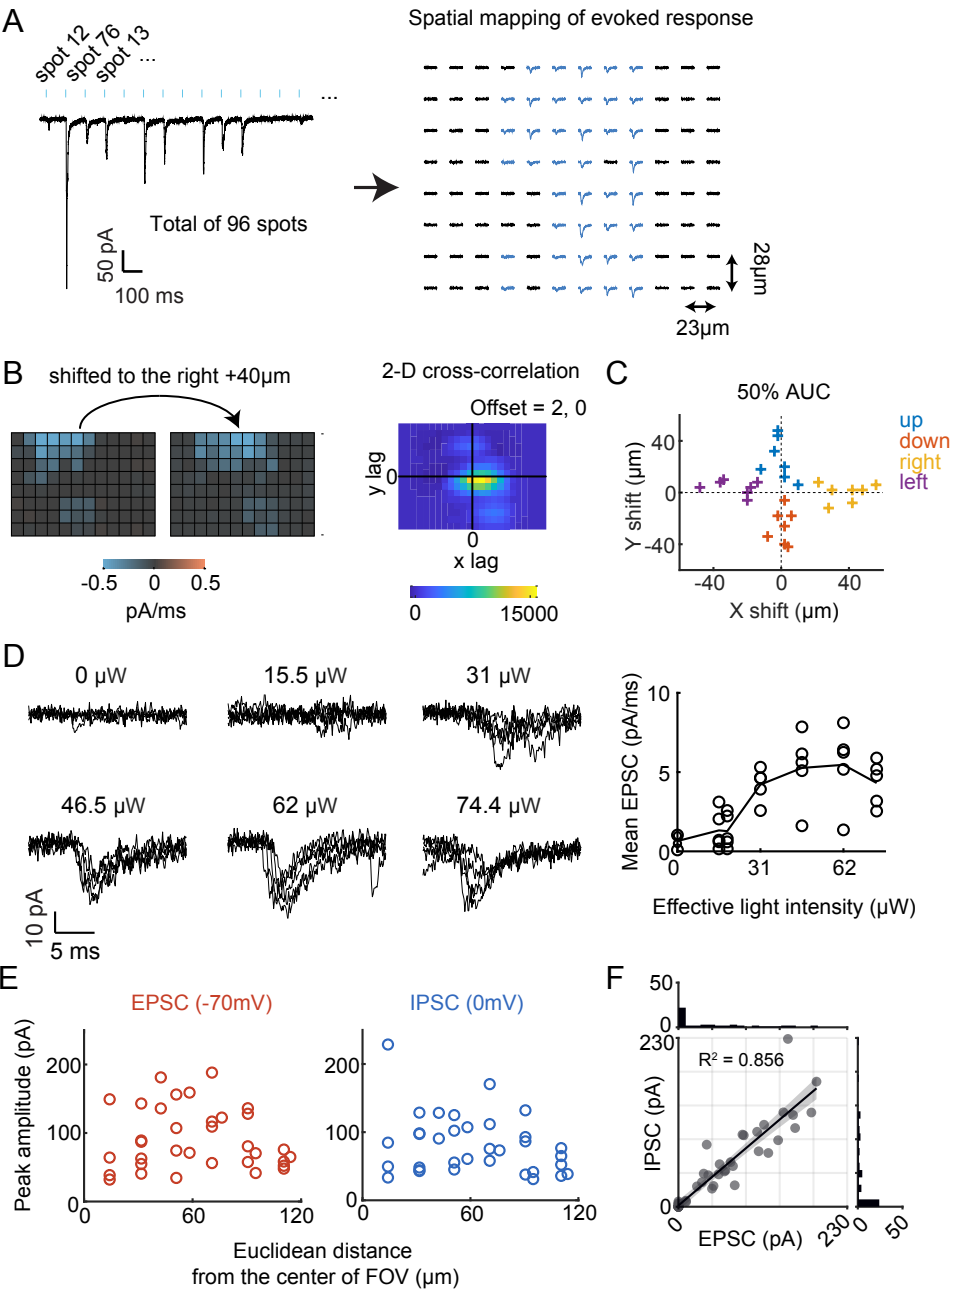

Supplemental Figure 4

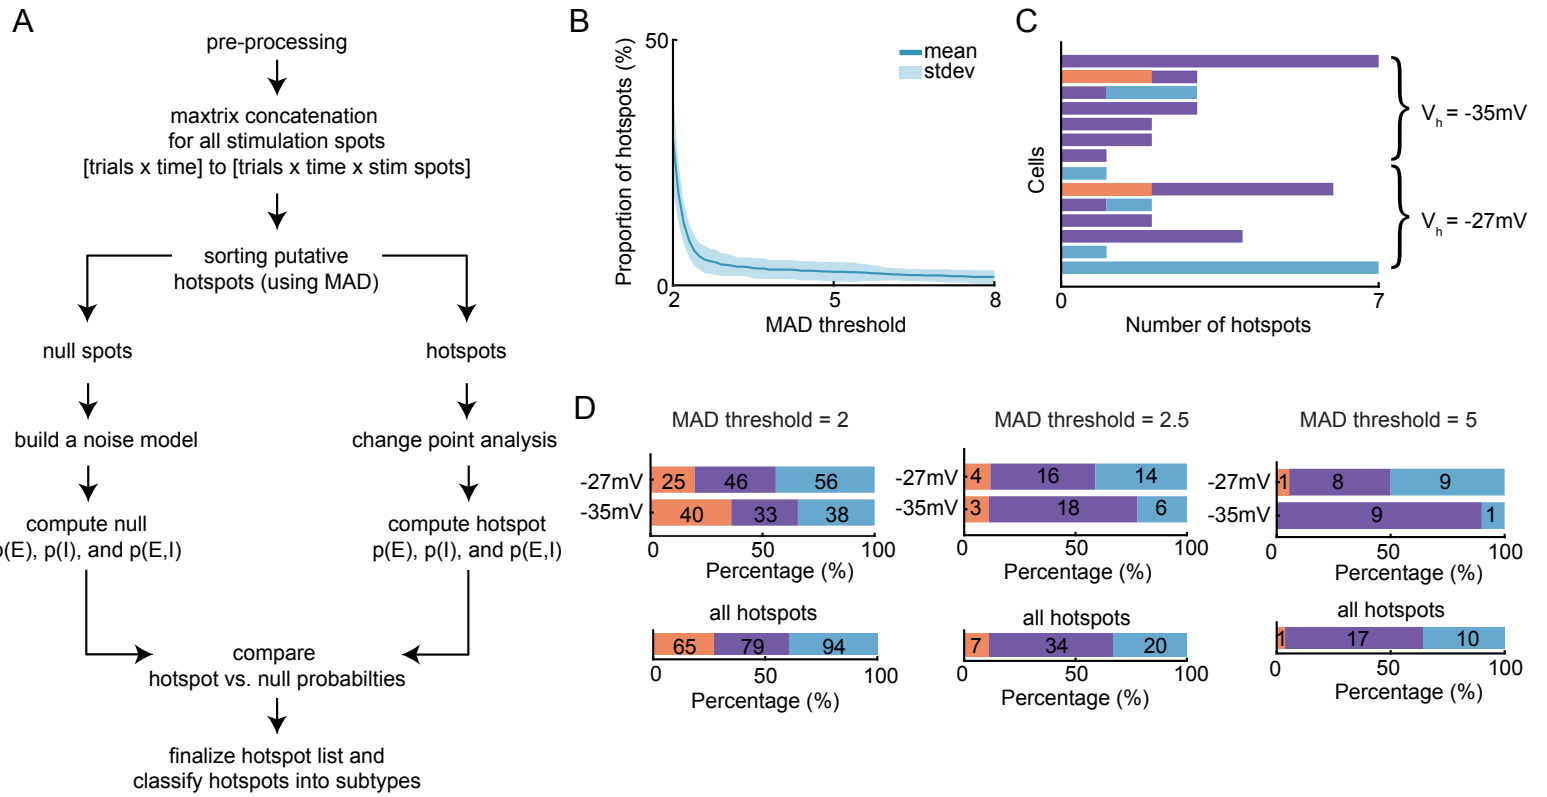



# Supplemental Figure 5

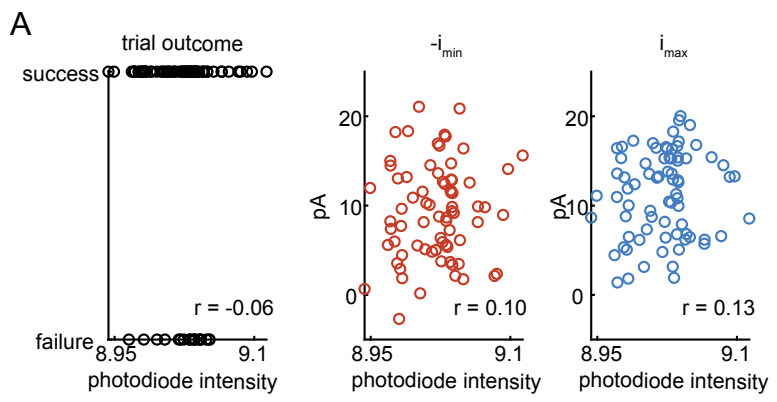

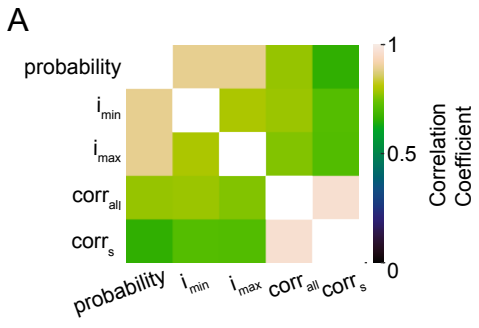

Supplemental Figure 7

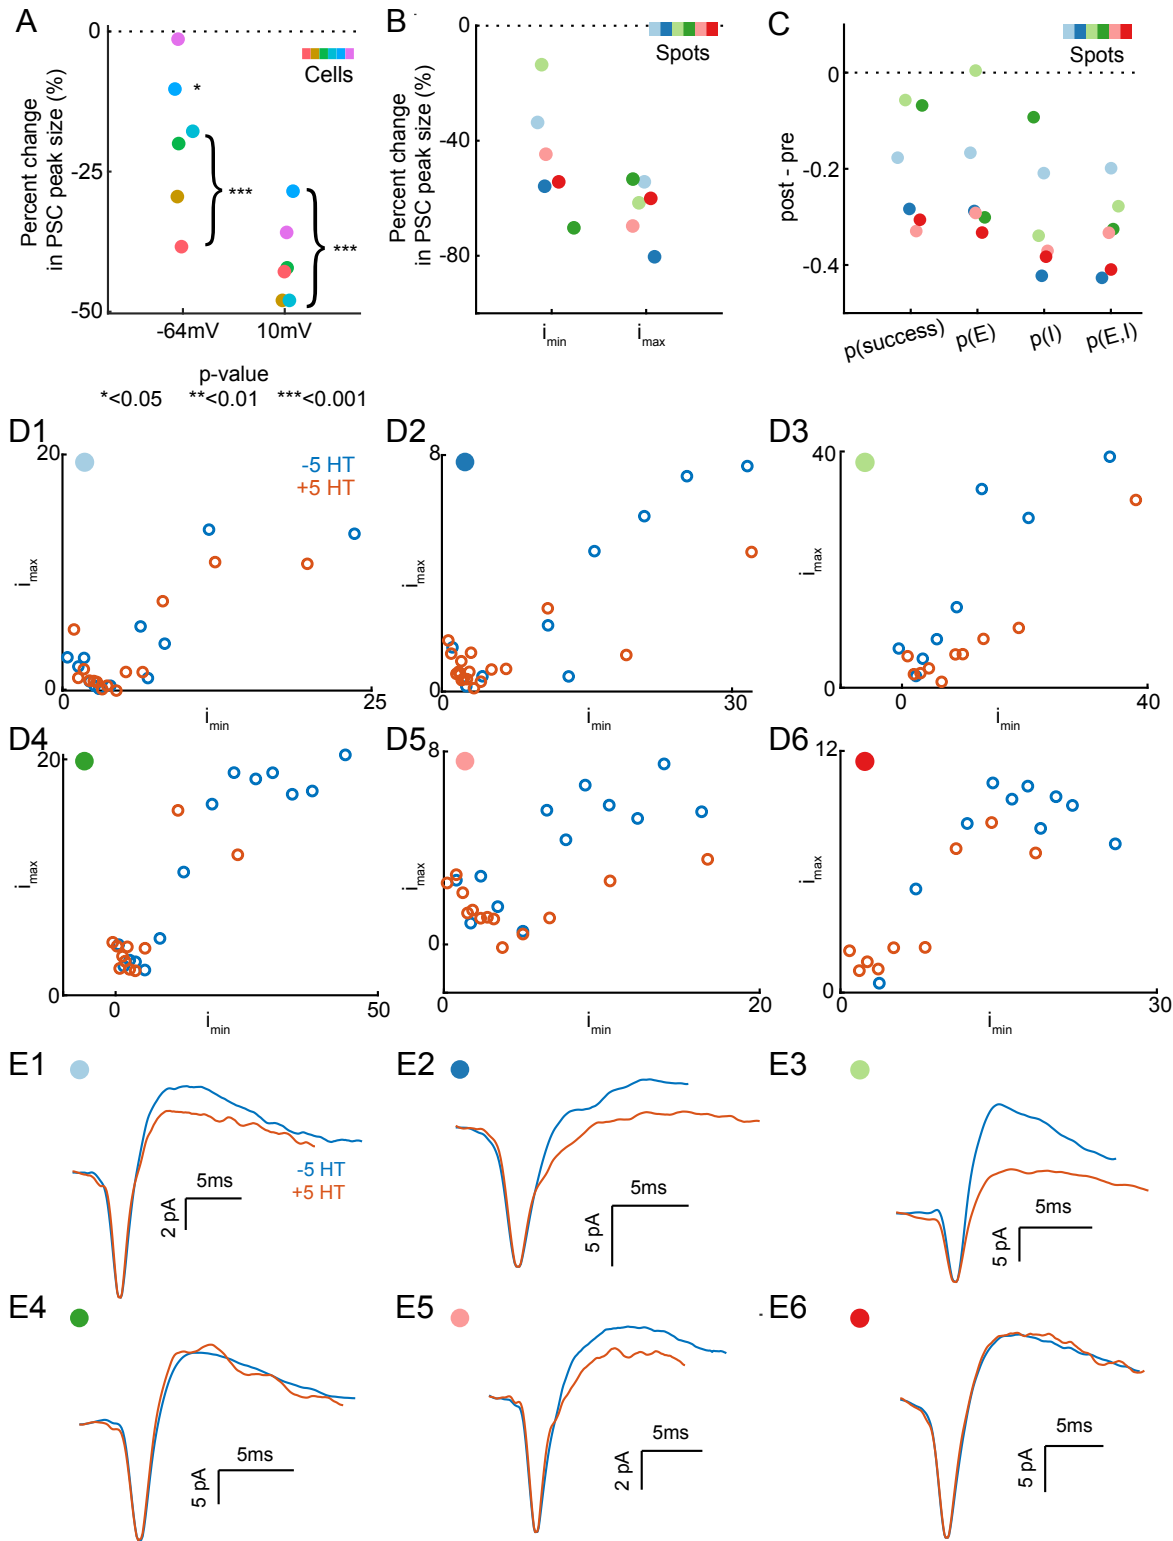

Source: https://www.biorxiv.org/content/10.1101/2021.03.23.436594v1.full.pdf
